# Supplementary material
Source: PubMed Central journal article supplement (PMC2262920)
Supplement: mmc1.pdf [file mmc1.pdf]

## Complex interventions to improve physical function and maintain independent living in elderly people: a systematic review and meta-analysis

### Ovid Medline search

Correspondence to:  
Andrew D Beswick, Department  
of Social Medicine, University of  
Bristol, Canynge Hall,  
Whiteladies Road, Bristol  
BS8 2PR, UK  
andy.beswick@bristol.ac.uk

- 1 randomized controlled trial.pt. (200968)
- 2 controlled clinical trial.pt. (68839)
- 3 randomized controlled trials.sh. (36419)
- 4 random allocation.sh. (52992)
- 5 double blind method.sh. (82169)
- 6 single blind method.sh. (8804)
- 7 1 or 2 or 3 or 4 or 5 or 6 (340755)
- 8 exp animal/ not human/ (2886189)
- 9 7 not 8 (322864)
- 10 clinical trial.pt. (404526)
- 11 exp CLINICAL TRIALS/ (162034)
- 12 (clin\$ adj25 trial\$).ti.ab. (111929)
- 13 ((singl\$ or doubl\$ or trebl\$ or tripl\$) adj25 (blind\$ or mask\$)).ti.ab. (82799)
- 14 placebos.sh. (23853)
- 15 placebo\$.ti.ab. (90977)
- 16 random\$.ti.ab. (317513)
- 17 research design.sh. (40109)
- 18 10 or 11 or 12 or 13 or 14 or 15 or 16 or 17 (733259)
- 19 18 not 8 (683086)
- 20 19 or 9 (694334)
- 21 (aged or "aged 80 and over").sh. (1425389)
- 22 frail elderly.sh. (2995)
- 23 elderly.tw. (95617)
- 24 elders.tw. (2457)
- 25 geriatric\$.tw. (18020)
- 26 (old adj5 people).tw. (2832)
- 27 21 or 22 or 23 or 24 or 25 or 26 (1443508)
- 28 geriatric assessment.sh. (7938)
- 29 health services for the aged.sh. (10073)
- 30 preventive health services.sh. (6997)
- 31 community health services.sh. (19778)
- 32 community health nursing.sh. (14550)
- 33 home care services.sh. (19782)
- 34 preventive medicine.sh. (6669)
- 35 nursing assessment.sh. (18264)
- 36 disability evaluation.sh. (16385)
- 37 house calls.sh. (1352)
- 38 (house adj5 calls).tw. (274)
- 39 home-based.tw. (1468)
- 40 (geriatric\$ adj5 assess\$).tw. (1509)
- 41 (home adj5 intervention\$).tw. (1302)
- 42 (home adj5 visit\$).tw. (3726)
- 43 (home adj5 assessment\$).tw. (1179)
- 44 (health adj5 assessment\$).tw. (10247)
- 45 (preventive adj5 program\$).tw. (2570)
- 46 health visitor\$.tw. (1557)
- 47 (preventive adj5 care).tw. (4276)
- 48 (preventive adj5 medicine).tw. (3155)
- 49 health promotion.sh. (23831)
- 50 (health adj5 promotion).tw. (9775)
- 51 occupational therapy.sh. (5908)
- 52 (occupation adj5 therap\$).tw. (127)
- 53 28 or 29 or 30 or 31 or 32 or 33 or 34 or 35 or 36 or 37 or 38 or 39 or 40 or 41 or 42 or 43 or 44 or 45 or 46 or 47 or 48 or 49 or 50 or 51 or 52 (160159)
- 54 social support.sh. (22915)
- 55 (social adj5 intervention).tw. (1348)
- 56 (psychosocial adj5 care).tw. (1741)
- 57 self efficacy.sh. (2378)
- 58 (self adj5 concept).tw. (2827)
- 59 (self adj5 efficacy).tw. (4161)
- 60 (social adj5 support).tw. (10804)
- 61 social isolation.sh. (7475)
- 62 social facilitation.sh. (991)
- 63 relaxation techniques.sh. (4417)
- 64 counseling.sh. (17949)
- 65 psychotherapy.sh. (26790)
- 66 social work.sh. (7935)
- 67 (behavior\$ adj5 modif\$).tw. (5268)
- 68 (behaviour\$ adj5 modif\$).tw. (1712)
- 69 (behavior\$ adj5 therap\$).tw. (6311)
- 70 (behaviour\$ adj5 therap\$).tw. (2469)
- 71 (cognitive adj5 therap\$).tw. (4284)
- 72 (relax\$ adj5 program\$).tw. (297)
- 73 (social adj5 program\$).tw. (3241)
- 74 (social adj5 work\$).tw. (10725)
- 75 counseling.tw. (19595)
- 76 counselling.tw. (9175)
- 77 psychotherap\$.tw. (18064)
- 78 54 or 55 or 56 or 57 or 58 or 59 or 60 or 61 or 62 or 63 or 64 or 65 or 66 or 67 or 68 or 69 or 70 or 71 or 72 or 73 or 74 or 75 or 76 or 77 (148875)
- 79 (physical\$ adj5 exercise).tw. (8106)
- 80 (physical\$ adj5 fitness).tw. (3581)
- 81 (exercise adj5 program\$).tw. (5239)
- 82 (exercise adj5 behavi\$).tw. (1684)
- 83 (physical\$ adj5 activit\$).tw. (22280)
- 84 exercise therapy.sh. (13098)
- 85 physical fitness.sh. (12430)
- 86 walking.sh. (5776)
- 87 tai chi.tw. (185)
- 88 tai ji.sh. (85)
- 89 79 or 80 or 81 or 82 or 83 or 84 or 85 or 86 or 87 or 88 (58656)
- 90 activities of daily living.sh. (26939)
- 91 hospitalization.sh. (41936)
- 92 institutionalization.sh. (3655)
- 93 (independent\$ adj5 living).tw. (1846)
- 94 (independent\$ adj5 life).tw. (1559)
- 95 function\$.tw. (1286351)
- 96 disabilit\$.tw. (45796)
- 97 balance.tw. (64321)
- 98 (accidental adj5 falls).tw. (204)
- 99 proprioception.tw. (1245)
- 100 hospitalisation.tw. (3796)
- 101 hospitalization.tw. (34448)
- 102 institutional\$.tw. (6465)
- 103 (activit\$ adj5 daily).tw. (15105)
- 104 ADL.tw. (2736)
- 105 (nursing adj5 home).tw. (11575)
- 106 health status.sh. (25483)
- 107 aging.sh. (123045)
- 108 quality of life.sh. (44933)
- 109 aging.tw. (54626)
- 110 locomot\$.tw. (25170)
- 111 mobility.tw. (53289)
- 112 (quality adj5 life).tw. (50104)
- 113 disabil\$.tw. (45816)
- 114 90 or 91 or 92 or 93 or 94 or 95 or 96 or 97 or 98 or 99 or 100 or 101 or 102 or 103 or 104 or 105 or 106 or 107 or 108 or 109 or 110 or 111 or 112 or 113 (1706604)
- 115 53 or 78 or 89 (348595)
- 116 20 and 27 and 114 and 115 (5043)
- 117 116 (5043)
