# Supplementary material
Source: PubMed Central journal article supplement (PMC2262920)

# Complex interventions to improve physical function and maintain independent living in elderly people: a systematic review and meta-analysis

Correspondence to: Andrew D Beswick, Department of Social Medicine, University of Bristol, Canynge Hall, Whiteladies Road, Bristol BS8 2PR, UK  
andy.beswick@bristol.ac.uk

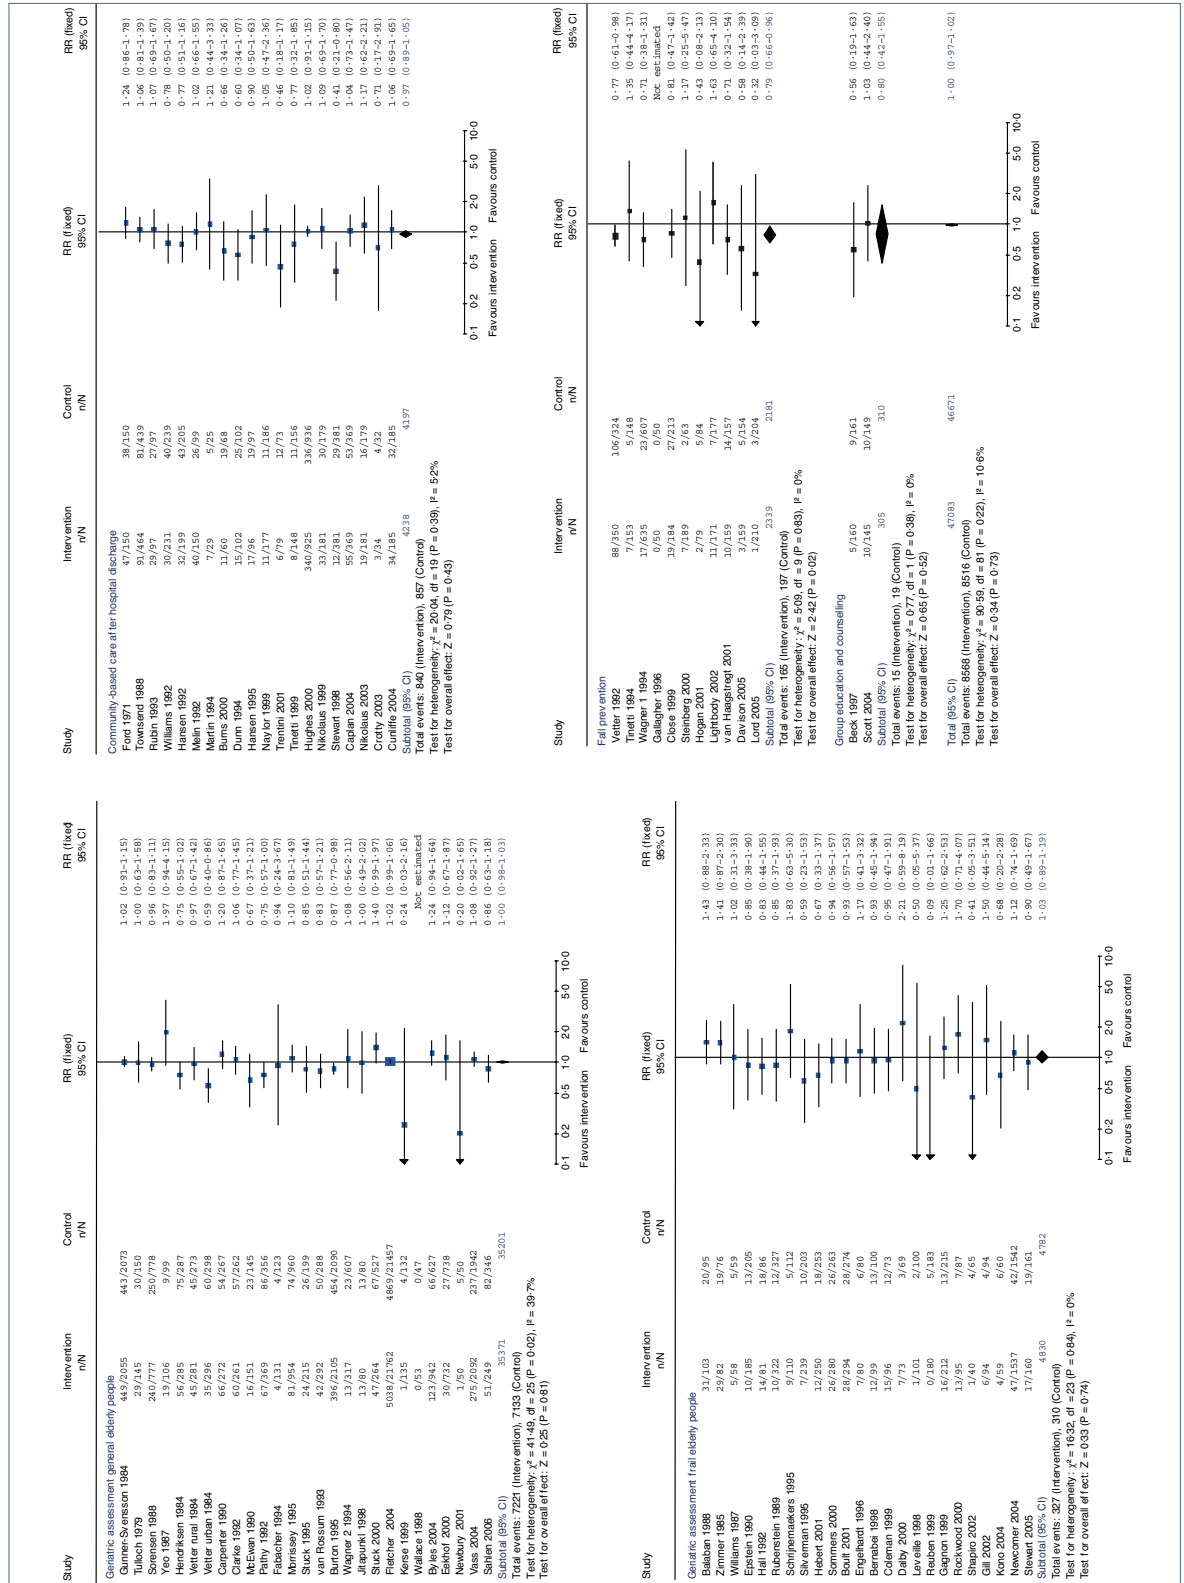

Supplement: mmc2.pdf [file mmc2.pdf]
