# Supplementary material
Source: PubMed Central journal article supplement (PMC2262920)
Supplement: mmc3.pdf [file mmc3.pdf]

Complex interventions to improve physical function and maintain independent living in elderly people: a systematic review and meta-analysis

Correspondence to: Andrew D Beswick, Department of Social Medicine, University of Bristol, Canynge Hall, Whiteladies Road, Bristol BS8 2PR, UK andy.beswick@bristol.ac.uk

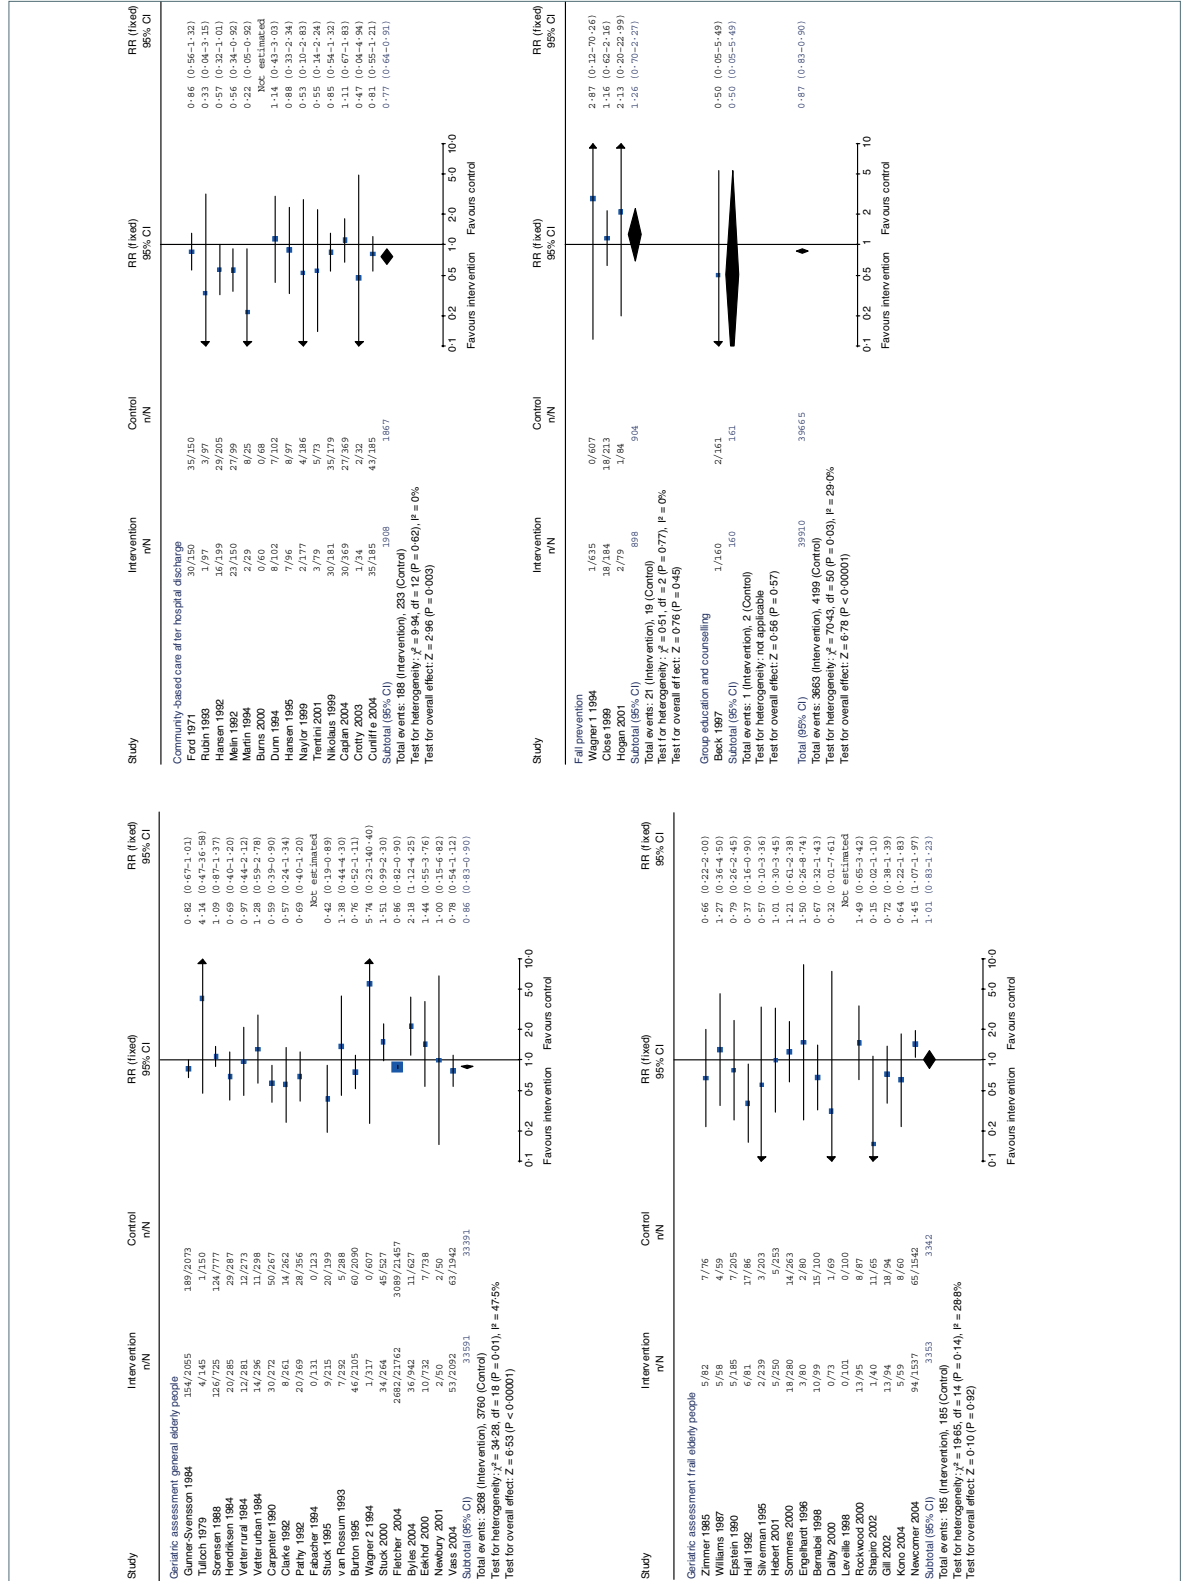

Webfigure 2: Relative risk (RR) of nursing home admission or residence at follow-up
