# Supplementary material
Source: PubMed Central journal article supplement (PMC2262920)
Supplement: mmc5.pdf [file mmc5.pdf]

## Complex interventions to improve physical function and maintain independent living in elderly people: a systematic review and meta-analysis

Correspondence to:  
 Andrew D Beswick, Department  
 of Social Medicine, University of  
 Bristol, Canynge Hall,  
 Whiteladies Road, Bristol  
 BS8 2PR, UK  
 andy.beswick@bristol.ac.uk

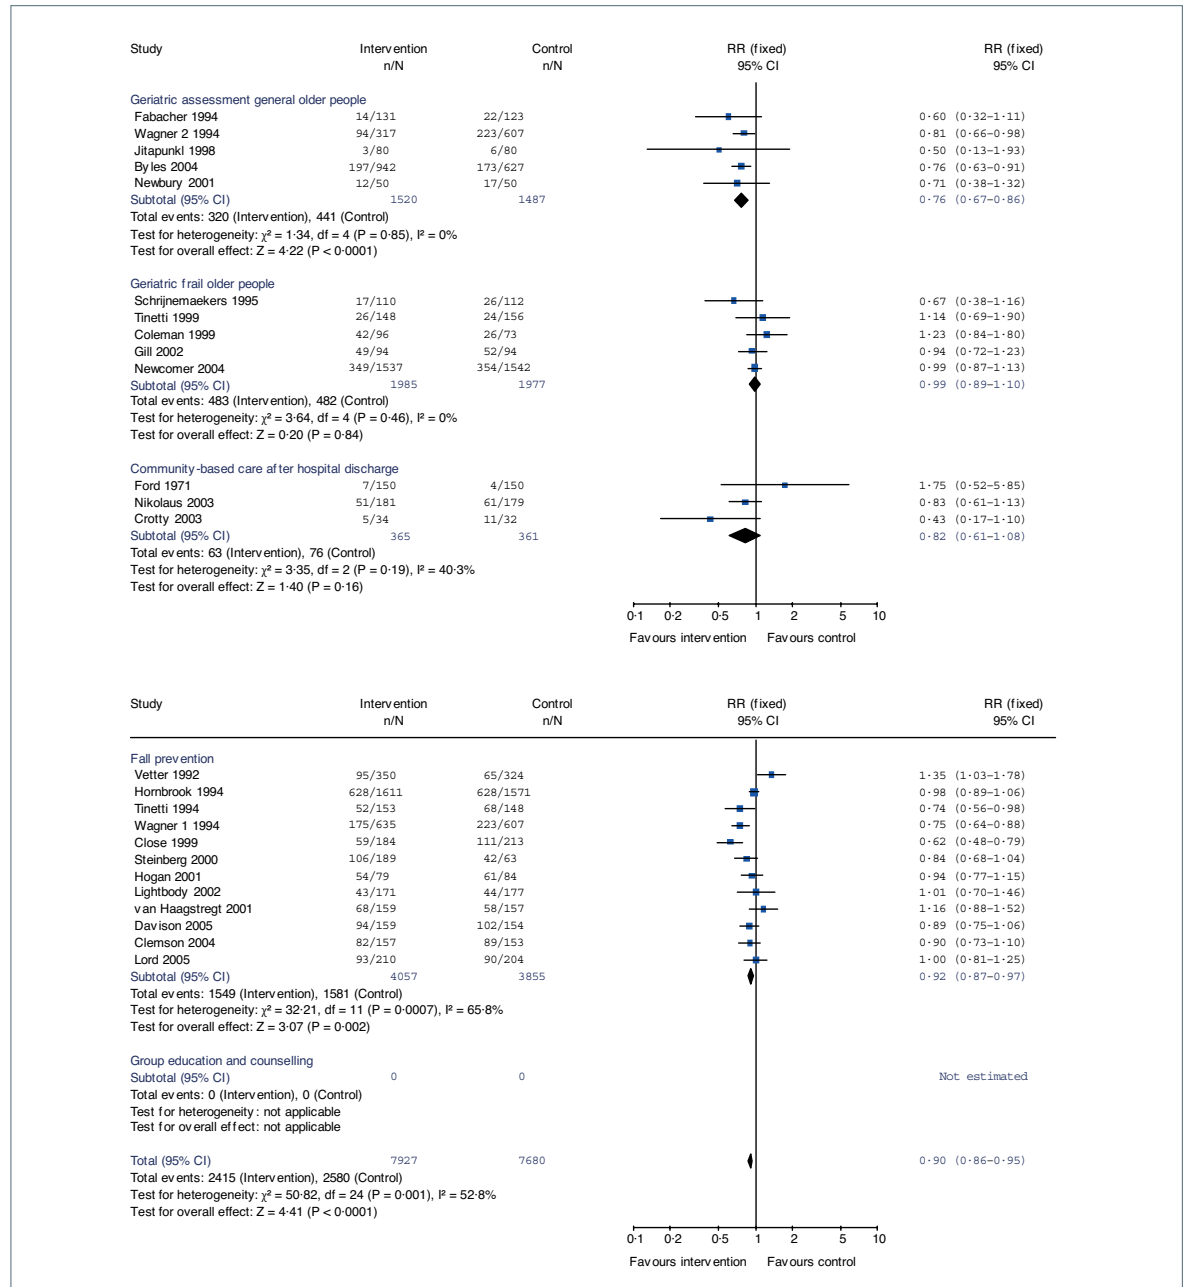

Webfigure 4: Relative risk (RR) of falling
