# Supplementary material
Source: PubMed Central journal article supplement (PMC2262920)
Supplement: mmc7.pdf [file mmc7.pdf]

## Complex interventions to improve physical function and maintain independent living in elderly people: a systematic review and meta-analysis

Correspondence to:  
Andrew D Beswick, Department  
of Social Medicine, University of  
Bristol, Canynge Hall,  
Whiteladies Road, Bristol  
BS8 2PR, UK  
andy.beswick@bristol.ac.uk

|                                                                            | Study setting<br>Number of participants<br>(intervention: control)<br>Mean age in intervention<br>group (% men)<br>Mortality rate | Intervention<br>Intensity<br>Control group activity                                                                                                                                                                                                                                                                          | Follow up<br>Outcomes<br>Losses to follow-up                                                                                                                         |
|----------------------------------------------------------------------------|-----------------------------------------------------------------------------------------------------------------------------------|------------------------------------------------------------------------------------------------------------------------------------------------------------------------------------------------------------------------------------------------------------------------------------------------------------------------------|----------------------------------------------------------------------------------------------------------------------------------------------------------------------|
| <b>Geriatric assessment general elderly people</b>                         |                                                                                                                                   |                                                                                                                                                                                                                                                                                                                              |                                                                                                                                                                      |
| Burton and colleagues<br>1995 <sup>27</sup><br>USA 1989                    | Primary care (HMO)<br>N=4195 (2105:2090)<br>Mean age 74 years (36%)<br>Mortality rate 5.1%                                        | Assessment mailed to primary care physician as focus of preventive visit<br>Follow-up counselling within 6 months<br>24 months with 4 contacts scheduled<br>Control group received pamphlet on good health practices                                                                                                         | Follow-up 24 and 48 months<br>Death, living at home, institutionalisation, QWB (Kaplan)<br>Losses to follow-up 5.2-16.7%                                             |
| Byles and colleagues<br>2004 <sup>28*</sup><br>Australia 1997              | Veterans and war widows<br>N=1569 (942:627)<br>Mean age 77 years (about 3%)<br>Mortality rate 4.0%                                | Home-based assessment by nurse, social worker, psychologist, therapist, and occupational therapist. Information provided to individual and GP. Telephone follow-up and 6 or 12 monthly visit<br>36 months with 3 or more visits<br>Control group received usual care                                                         | Follow-up 36 months<br>Death, living at home, permanent nursing home admission, SF-36 physical function, hospital admission, falls<br>Losses to follow-up 12.0-20.1% |
| Carpenter and Demopoulos 1990 <sup>29</sup><br>UK date not stated          | Primary care<br>N=539 (272:267)<br>Mean age 80.2 years (35%)<br>Mortality rate 7.4%                                               | Home visits by lay volunteers for activities of daily living dependency surveillance.<br>Referrals to GP if specified increase recorded<br>36 months with approximately 6 to 12 visits<br>Control group completed baseline ADL questionnaire                                                                                 | Follow-up 36 months<br>Death, living at home, long term nursing care, Winchester ADL, hospital admissions, falls<br>Losses to follow-up 9.1%                         |
| Clarke and colleagues<br>1992 <sup>30</sup><br>UK 1985                     | General practice<br>N=523 (261:262)<br>Mean age 81 years (not known)<br>Mortality rate 7.5%                                       | Social intervention initiated at home by lay community worker. Assistance tailored to request for help<br>15-24 months with 3 or more visits<br>Control group completed baseline interview only                                                                                                                              | Follow-up 36 months<br>Died or moved away, living at home, admitted to institution, Jagger ADL<br>Losses to follow-up 0.2%                                           |
| Eekhof and colleagues<br>2000 <sup>31</sup><br>Netherlands date not stated | General practice<br>N=1470 (732:738)†<br>Mean age 81.3 years (37%)<br>Mortality rate 3.9%                                         | Home or surgery based screening for hearing, visual, continence, and mobility disorders by general practitioner. Interventions as appropriate<br>1 visit<br>Control group had intervention delayed by 12 months                                                                                                              | Follow-up 12 months<br>Death, living at home, nursing home admissions, prevalence of mobility disorders<br>Losses to follow-up 4.9-11.8%                             |
| Fabacher and colleagues<br>1994 <sup>32</sup><br>USA 1988                  | Armed services veterans<br>N=254 (131:123)<br>Mean age 73.5 years (98%)<br>Mortality rate 3.1%                                    | Home based assessment by physician's assistant or nurse. Review by geriatrician. Education, recommendations, and referrals. Follow-up by volunteers and research staff<br>12 months with approximately 3 visits<br>Control group received follow-up telephone interviews                                                     | Follow-up 12 months<br>Death, living at home, nursing home admissions, Katz ADL, hospital admissions, falls<br>Losses to follow-up 12.6-20.1%                        |
| Fletcher and colleagues<br>2004 <sup>33*</sup><br>UK 1995                  | General practice<br>N=43,219 (21762:21457)†<br>Mean age 81.5 years (36%)<br>Mortality rate 7.6%                                   | Brief assessment questionnaire followed by assessment at home or GP surgery by nurse. Appropriate referrals to clinical, medical and social services<br>One detailed assessment visit<br>Control group received brief questionnaire and detailed examination by study nurse for those who triggered need for full assessment | Follow-up 36 months, hospital 24 months<br>Death, living at home estimated, institution admissions, SIP mobility, hospital admissions<br>Losses to follow-up 0-17.8% |
| Fox and colleagues 1997 <sup>34</sup><br>USA 1994                          | Community living<br>N=237 (118:119)<br>Mean age not stated (about 30%)<br>Mortality rate estimated <10%                           | Home -based assessment by public -health nurse. Health plan, counselling and appropriate referrals<br>Intervention comprised one visit<br>Control group received health assessment but no health plan or individual counselling                                                                                              | Follow-up 12 months<br>No relevant outcome reported                                                                                                                  |
| Gunner-Svensson and colleagues 1984 <sup>35</sup><br>Denmark 1972          | Population register<br>N=4,128 (2 055:2 073)‡<br>Mean age 78.6 years (42%)<br>Mortality rate 7.2%                                 | Home based case finding by nurse using structured questionnaire. Social medical intervention<br>36 months with a mean of 5 visits<br>Control group received usual care                                                                                                                                                       | Follow-up 36 months<br>Death, living at home estimated, nursing home admission<br>Losses to follow-up estimated 0%                                                   |
| Hendriksen and colleagues<br>1984 <sup>36*</sup><br>Denmark 1980           | Social welfare register<br>N=572 (285:287)<br>Mean age 78.4 years (38%)<br>Mortality rate 7.6%                                    | Home visit by nurse or research fellow to assess social and health conditions. Coordination of community services. Visit every 3 months, telephone contact and extra visits could be arranged<br>36 months with up to 12 visits per person<br>Controls not informed or contacted until 3 months before end of study          | Follow-up 36 months<br>Death, living at home, nursing home care, hospital admissions<br>Losses to follow-up 0%                                                       |
| Jitapunkl 1998 <sup>37</sup><br>Thailand 1993                              | Living in slum area<br>N=160 (80:80)<br>Mean age 76.1 years (about 34%)<br>Mortality rate 5.4%                                    | Home based surveillance by lay worker at 3 monthly intervals. If ADL decline, nurse or geriatrician visit for assessment, appropriate treatment, education, rehabilitation, and referrals<br>36 months with 12 scheduled visits<br>Control group received baseline assessment                                                | Follow-up 36 months<br>Death, Barthel ADL, hospital admissions, falls during last 3 months<br>Losses to follow-up 11.3%                                              |

(Continues on next page)

|                                                                                | <b>Study setting</b><br><b>Number of participants</b><br><b>(intervention: control)</b><br><b>Mean age in intervention</b><br><b>group (% men)</b><br><b>Mortality rate</b> | <b>Intervention</b><br><b>Intensity</b><br><b>Control group activity</b>                                                                                                                                                                                                                                                 | <b>Follow up</b><br><b>Outcomes</b><br><b>Losses to follow-up</b>                                                                                                                    |
|--------------------------------------------------------------------------------|-----------------------------------------------------------------------------------------------------------------------------------------------------------------------------|--------------------------------------------------------------------------------------------------------------------------------------------------------------------------------------------------------------------------------------------------------------------------------------------------------------------------|--------------------------------------------------------------------------------------------------------------------------------------------------------------------------------------|
| (Continued from previous page)                                                 |                                                                                                                                                                             |                                                                                                                                                                                                                                                                                                                          |                                                                                                                                                                                      |
| Kerse and colleagues<br>1999 <sup>38</sup><br>Australia 1995                   | General practice<br>N=267 (135:132)†<br>Mean age 72.9 years (46%)<br>Mortality rate 1.9%                                                                                    | Health promotion provided based on educational programme for general practitioners. Assessment, education and medical review by GP<br>1 or more visits<br>Control GPs did not receive educational programme                                                                                                              | Follow-up 12 months<br>Death and institutionalised, living at home, Fix human activities profile<br>Losses to follow-up 5.2–10.9%                                                    |
| McEwan and colleagues<br>1990 <sup>39</sup><br>UK 1986                         | Registered with GP<br>N=296 (151:145)<br>Mean age 81 years (not known)<br>Mortality rate 7.9%                                                                               | Home visit for assessment by nurse. Care plan, referrals, and advice<br>Single visit<br>Controls received usual care from primary care team                                                                                                                                                                              | Follow-up 20 months<br>Death, Nottingham health profile mobility<br>Losses to follow-up 6.8–9.5%                                                                                     |
| Morrissey and colleagues<br>1995 <sup>40</sup><br>USA 1988                     | Primary care practices<br>N=1914 (954:960)<br>60% less than 75 years old (39%)<br>Mortality rate 4.0%                                                                       | Counselling by physician at home or physician office and preventive care.<br>Appropriate health promotion. Mobilisation of formal and informal care<br>24 months with 6 visits<br>Control group received usual preventive services and transport costs                                                                   | Follow-up 24 months<br>Death, QWB, total hospital admissions<br>Losses to follow-up 0–4.4%                                                                                           |
| Newbury and colleagues<br>2001 <sup>41*</sup><br>Australia 1998                | General practice register<br>N=100 (50:50)<br>Mean age 78.5 years (63%)<br>Mortality rate 6.0%                                                                              | Assessment at home by nurse. Problems identified reported to GP<br>1 visit<br>Control group completed SF36 and received usual care                                                                                                                                                                                       | Follow-up 12 months<br>Death, living at home, living in institution, Barthel ADL, falls                                                                                              |
| Pathy and colleagues<br>1992 <sup>42</sup><br>UK dates not stated              | General practice<br>N=725 (369:356)<br>Mean age 73.2 years (40%)<br>Mortality rate 7.0%                                                                                     | Assessment by self completed questionnaire. Home visit by health visitor if problems identified. Advice, education, and referrals<br>36 months with 0 to 3 visits and more as needed<br>Control group had the services of a health visitor                                                                               | Follow-up 36 months<br>Death, living at home estimated, long term institution admission, Townsend score, hospital admissions<br>Losses to follow-up <6.5–20%                         |
| Sahlen and colleagues<br>2006 <sup>43</sup><br>Sweden 2000                     | People living independently<br>N=595 (249:346)‡<br>Mean age 79.7 years (45%)<br>Mortality rate 5.0%                                                                         | Assessment at home and preventive visits by nurse and case manager.<br>Counselling and education. Advice to contact primary care centre if needed<br>4 visits at 6 monthly intervals<br>Control group not informed of trial                                                                                              | Follow-up estimated mean 54 months<br>Death<br>Losses to follow-up 0%                                                                                                                |
| Sørensen and colleagues<br>1988 <sup>44</sup><br>Denmark 1978                  | Population register<br>N=1555 (777:778)‡<br>Mean age 79.8 years (about 48%)<br>Mortality rate 10.5%                                                                         | Assessment at home by social worker and physician. Social services informed of unmet needs. Relevant referrals to GP who received summary of conclusions<br>1 visit of average 2 hours duration<br>No intervention in control group                                                                                      | Follow-up 36 months (deaths/ institution 60 months)<br>Death, nursing home admissions, hospital admissions<br>Losses to follow-up 0%                                                 |
| Stuck and colleagues<br>1995 <sup>45*</sup><br>USA 1988                        | Voter registration list<br>N=414 (215:199)<br>Mean age 81 years (30%)<br>Mortality rate 4.0%                                                                                | Annual assessment at home by nurse practitioner. Recommendations developed with geriatrician. Follow-up to monitor implementation and facilitate adherence<br>36 months with 12 visits<br>Control group received a yearly follow-up visit and questionnaire                                                              | Follow-up 36 months<br>Death, living at home, nursing home admissions, Lawton ADL, hospital admissions<br>Losses to follow-up 0–11.4%                                                |
| Stuck and colleagues<br>2000 <sup>46*</sup><br>Switzerland 1993                | Health insurance list<br>N=791 (264:527)<br>Mean age 82 years (27%)<br>Mortality rate 4.8%                                                                                  | Annual assessment at home by nurse. Recommendations made with geriatrician. Health education, results to GP, and follow-up. Physiotherapist, occupational therapist, dietician, and social, worker involved if needed<br>24 months with a mean of 8.5 visits<br>Control group received baseline interview and usual care | Follow-up 36 months (24 months for hospital admissions/ Lawton ADL)<br>Death, living at home, nursing home admissions, Lawton ADL, hospital admissions<br>Losses to follow-up 0–0.1% |
| Tulloch and Moore 1979 <sup>47</sup><br>UK 1972                                | General practice<br>N=295 (145:150)<br>Mean age not specified (54%)<br>Mortality rate 10.0%                                                                                 | Regular socio-economic and medical surveillance in GP clinic by GP, nurse, and health visitor. Home visit by nurse for assessment. Offer of GP examination<br>1 visit and a further visit to GP offered per year<br>Controls received conventional patient-initiated care                                                | Follow-up 24 months<br>Death, living at home, living in nursing home, domestic care rating, hospital admissions<br>Losses to follow-up 4.4–14.5%                                     |
| van Rossum and colleagues 1993 <sup>48</sup><br>Netherlands date not specified | Community survey<br>N=580 (292:288)<br>Mean age 78.4 years (42%)<br>Mortality rate 5.3%                                                                                     | Home visit by public-health nurse for discussion of health topics with advice and information. Advised to contact appropriate services or referred to GP<br>36 months with 4 or more visits per year as needed<br>Control group received no home visits                                                                  | Follow-up 36 months<br>Death, living at home estimated, nursing home admissions, authors' own ADL, hospital admissions<br>Losses to follow-up 0–7.2%                                 |
| Vass and colleagues<br>2004 <sup>49*</sup><br>Denmark 1999                     | General practice<br>N=4,034 (2,092:1,942)†<br>Two groups aged 75 and 80 (about 56%)<br>Mortality rate 4.2%                                                                  | GP and lay-home visitor educational intervention. Assessment at home visit by GP and lay home visitor. Appropriate follow-up and referral to GP<br>1 or more visits<br>Control group general practitioners and home visitors did not receive an educational intervention                                                 | Follow-up 36 months<br>Death, living at home, nursing home admission, MOB-H functional decline in mobility<br>Losses to follow-up 0.9–7.4%                                           |
| Vetter and colleagues<br>1984 <sup>50</sup><br>UK date not specified           | Rural community<br>N=554 (281:273)<br>Mean age 77.5 years (not known)<br>Mortality rate 8.1%                                                                                | Assessment by home visitor. Health education, referral, and follow-up. Results sent to GP practice<br>24 months with two to three unsolicited visits<br>Control group received no intervention                                                                                                                           | Follow-up 24 months<br>Death, living at home, residential care, Townsend score<br>Losses to follow-up 0–0.9%                                                                         |

(Continues on next page)

|                                                                                                      | <b>Study setting</b><br><b>Number of participants</b><br><b>(intervention: control)</b><br><b>Mean age in intervention</b><br><b>group (% men)</b><br><b>Mortality rate</b> | <b>Intervention</b><br><b>Intensity</b><br><b>Control group activity</b>                                                                                                                                                                                                                             | <b>Follow up</b><br><b>Outcomes</b><br><b>Losses to follow-up</b>                                                                                                  |
|------------------------------------------------------------------------------------------------------|-----------------------------------------------------------------------------------------------------------------------------------------------------------------------------|------------------------------------------------------------------------------------------------------------------------------------------------------------------------------------------------------------------------------------------------------------------------------------------------------|--------------------------------------------------------------------------------------------------------------------------------------------------------------------|
| <i>(Continued from previous page)</i>                                                                |                                                                                                                                                                             |                                                                                                                                                                                                                                                                                                      |                                                                                                                                                                    |
| Vetter and colleagues<br>1984 <sup>30</sup> urban community<br>UK date not specified                 | Urban community<br>N=594 (296:298)<br>Mean age 77.5 years (not known)<br>Mortality rate 8.0%                                                                                | Assessment by home visitor. Health education, referral and follow-up. Results sent to GP practice<br>24 months with two to three unsolicited visits<br>Controls received no intervention                                                                                                             | Follow-up 24 months<br>Death, living at home, residential care, Townsend score<br>Losses to follow-up 0-2.4%                                                       |
| Wagner and colleagues<br>1994 <sup>31</sup> Health promotion intervention (2)<br>USA date not stated | HMO patients<br>N=924 (317:607)<br>Mean age 72.6 years (42%)<br>Mortality rate 1.9%                                                                                         | Assessment at home by nurse. Counselling by nurse and educator, pamphlets, and classes. No emphasis on exercise<br>1 visit<br>Controls received no intervention                                                                                                                                      | Follow-up 24 months<br>Death, living at home, living in institution, MOS SF-36 physical limitations, falls<br>Losses to follow-up 0-1.5%                           |
| Wallace and colleagues<br>1998 <sup>32</sup><br>USA date not stated                                  | Senior-centre volunteers<br>N=100 (53:47)<br>Mean age 73.1 years (27%)<br>Mortality rate 0%                                                                                 | Risk factor review by nurse at senior centre. Targeted health promotion, supervised exercise programme, referrals to physician, and classes<br>6 months with 72 classes of 1 hour<br>Control group had intervention deferred for 6 months                                                            | Follow-up 6 months<br>Death, living at home estimated, SF36 physical function<br>Losses to follow-up 7-10%                                                         |
| Yeo and colleagues 1987 <sup>33</sup><br>USA 1979                                                    | Medical centre<br>N=205 (106:99)<br>Mean age 73 years (99.5%)<br>Mortality rate 9.1%                                                                                        | Assessment at outpatient clinic by specialist physician, nurse, and social worker. Health education, classes, referrals, and home nursing visits if needed<br>18 months with unspecified number of visits<br>Controls attended general medical clinic                                                | Follow-up 18 months<br>Death, Sickness impact profile ADL component, hospital admissions<br>Losses to follow-up 9.5-15.2%                                          |
| <b>Geriatric assessment in elderly people selected as frail</b>                                      |                                                                                                                                                                             |                                                                                                                                                                                                                                                                                                      |                                                                                                                                                                    |
| Balaban and colleagues<br>1988 <sup>34</sup><br>USA 1981                                             | Primary care<br>N=198 (103:95)<br>Mean age 69.2 years (24%)<br>Mortality rate 12.9%                                                                                         | Assessment at home and follow-up care by physician, nurse, lay people, students, and health-care providers<br>24 months with 1 or more visits<br>Control group received usual office based care with family physician                                                                                | Follow-up 24 months<br>Death, ADL Barthel, hospital admissions<br>Losses to follow-up 1-2%                                                                         |
| Bernabei and colleagues<br>1998 <sup>35</sup><br>Italy 1995                                          | Recipients of home health care<br>N=199 (99:100)<br>Mean age 80.7 years (29%)<br>Mortality rate 12.6%                                                                       | Assessment at home by case managers. Care plan formulated by case-manager, geriatrician, social worker, nurse, and GP<br>12 months with about six visits<br>Control group received usual care                                                                                                        | Follow-up 12 months<br>Death, living at home estimated, any nursing home admission, British Columbia ADL, hospital admission<br>Losses to follow-up 0%             |
| Boult and colleagues<br>2001 <sup>36</sup><br>USA 1994                                               | Community Medicare screening<br>N=568 (294:274)<br>Mean age 78.7 years (56%)<br>Mortality rate 6.6%                                                                         | Assessment at home by social worker. Care planned and managed by social worker, nurse, and geriatrician<br>6 months with estimated 8 contacts<br>Control group primary care physicians notified if high risk of hospitalisation                                                                      | Follow-up 18 months<br>Death, SIP physical functioning<br>Losses to follow-up 0-3%                                                                                 |
| Coleman and colleagues<br>1999 <sup>37</sup><br>USA date not stated                                  | Health cooperative primary care facility<br>N=169 (96:73)†<br>Mean age 77.3 years (49%)<br>Mortality rate 8.0%                                                              | Assessment at clinic by physician, nurse, pharmacist, and social worker. Organisation of primary care service delivery to emphasise reduction in disability. Individual counselling<br>24 months with estimated seven to eight contacts<br>Control group received usual care                         | Follow-up 24 months<br>Death, SF-36 physical function, hospital admissions, falls<br>Losses to follow-up 4.1-8.3%                                                  |
| Dalby and colleagues<br>2000 <sup>38*</sup><br>Canada 1995                                           | Primary care screening<br>N=142 (73:69)<br>Mean age 79.1 years (33%)<br>Mortality rate 6.0%                                                                                 | Nurse review of medical record. Home-based assessment. Integration of community services and agencies into care plan with primary care physician, patient, family, caregivers, and other health-care professionals<br>14 months with 1 visit and more as needed<br>Control group received usual care | Follow-up 14 months<br>Death, living at home, moved to nursing home, Lawton IADL, SF-36 physical functioning, hospital admissions<br>Losses to follow-up 12.7%     |
| Engelhardt and colleagues<br>1996 <sup>39</sup><br>USA 1994                                          | Above average users of outpatient clinic services<br>N=160 (80:80)<br>Mean age 71.7 years (100%)<br>Mortality rate 6.1%                                                     | Assessment at outpatient clinic by geriatrician, nurse practitioner, and social worker. Development and implementation of care plan with periodic reassessment<br>16 months with a mean of 7 visits<br>Control group attended primary care clinic with internists and nurse support                  | Follow-up 16 months<br>Death, living at home, nursing home admissions, Granger functional independence measure, hospital admissions<br>Losses to follow-up 0-23.1% |
| Epstein and colleagues<br>1990 <sup>40</sup><br>USA 1985                                             | HMO<br>N=390 (185:205)<br>Mean age 76.7 years (51%)<br>Mortality rate 5.9%                                                                                                  | Clinic-based and home-based assessment by geriatrician, geriatric nurse practitioner, and geriatric social worker. Care plan formulated with patient and family<br>2 months with 1 visit and follow-up by telephone<br>Control group received usual care                                             | Follow-up 12 months<br>Death, living at home, nursing home admission, Bergner SIP physical function, hospital admissions<br>Losses to follow-up 0-9%               |
| Gagnon and colleagues<br>1999 <sup>61*</sup><br>Canada 1996                                          | Emergency department in previous 12 months<br>N=427 (212:215)<br>Mean age 81.4 years (42%)<br>Mortality rate 8.1%                                                           | Nurse led coordination and provision of health-care services. Assessment and interventions according to framework. Home visits, telephone calls and bleeper<br>Mean 4 visits, 3 phone calls<br>Controls received usual hospital and community services                                               | Follow-up 10 months<br>Death, OARS ADL, SF-36 physical function, total hospital admissions<br>Losses to follow-up 0-20.9%                                          |

(Continues on next page)

|                                                                       | <b>Study setting</b><br><b>Number of participants</b><br><b>(intervention: control)</b><br><b>Mean age in intervention</b><br><b>group (% men)</b><br><b>Mortality rate</b> | <b>Intervention</b><br><b>Intensity</b><br><b>Control group activity</b>                                                                                                                                                                                                                                                                                                                                               | <b>Follow up</b><br><b>Outcomes</b><br><b>Losses to follow-up</b>                                                                                                        |
|-----------------------------------------------------------------------|-----------------------------------------------------------------------------------------------------------------------------------------------------------------------------|------------------------------------------------------------------------------------------------------------------------------------------------------------------------------------------------------------------------------------------------------------------------------------------------------------------------------------------------------------------------------------------------------------------------|--------------------------------------------------------------------------------------------------------------------------------------------------------------------------|
| (Continued from previous page)                                        |                                                                                                                                                                             |                                                                                                                                                                                                                                                                                                                                                                                                                        |                                                                                                                                                                          |
| Gill and colleagues 2002 <sup>62*</sup><br>USA 1999                   | Primary care screening<br>N=188 (94:94)<br>Mean age 82.8 years (20%)<br>Mortality rate 5.3%                                                                                 | Home-based assessment by physical therapist. Education and training, and home-based exercise programme<br>12 months with a mean of 16 visits (range 7–19)<br>Controls received health education programme                                                                                                                                                                                                              | Follow-up 12 months<br>Death, living at home, nursing home admission, Gill summary disability score, hospital admissions, falls<br>Losses to follow-up 0% (at 12 months) |
| Hall and colleagues 1992 <sup>63</sup><br>Canada 1986                 | People receiving personal care at home<br>N=167 (81:86)<br>Mean age 78 years (22%)<br>Mortality rate 6.4%                                                                   | Home-based nurse led personalised health promotion. Personal health plan, referrals and follow-up visits<br>36 months with approximately 7 or more visits<br>Control group received standard long term care with yearly monitoring                                                                                                                                                                                     | Follow-up 36 months<br>Death, living at home, placement in facility<br>Losses to follow-up 0%                                                                            |
| Hebert and colleagues 2001 <sup>64</sup><br>Canada 1993               | Population register<br>N=503 (250:253)<br>Mean age 80.2 years (36%)<br>Mortality rate 6.0%                                                                                  | Nurse led home-based assessment. Appropriate interventions recommended to GP and direct referrals<br>6 months with 1 visit and 5 scheduled phone contacts<br>Controls received usual health care                                                                                                                                                                                                                       | Follow-up 12 months<br>Death, living at home, admission to nursing home or long-term care hospital, Hebert SMAF ADL, hospital admission<br>Losses to follow-up 0–1.8%    |
| Kono and colleagues 2004 <sup>65</sup><br>Japan 2000                  | People identified by local volunteers<br>N=119 (59:60)<br>Mean age 82.5 years (21%)<br>Mortality rate 5.6%                                                                  | Home-based assessment by public-health nurse. Care recommendations and private or public home services provided if required<br>18 months with a mean of 4.3 home visits (range 1–20)<br>Controls received routine care                                                                                                                                                                                                 | Follow-up 18 months<br>Death, living at home, nursing home at follow-up, Barthel ADL (authors' modification)<br>Losses to follow-up 1.7%                                 |
| Leveille and colleagues 1998 <sup>66*</sup><br>USA 1995               | Senior citizens centre<br>N=201(101:100)<br>Mean age 77.1 years (44%)<br>Mortality rate 1.5%                                                                                | Assessment based on primary care records and assessment at home or senior centre by nurse. Health action plan, support from volunteer mentor, referrals and encouragement to attend exercise and disease self-management classes<br>3 months with a mean of 3 visits per person (range 1–8). 35% attended classes<br>Controls received tour of the senior centre and a schedule of activities                          | Follow-up 12 months<br>Death, living at home, institutionalisation, Fries HAQ, SF-36 physical function, hospital admissions, falls<br>Losses to follow-up 0–9.9%         |
| Newcomer and colleagues 2004 <sup>67*</sup><br>USA 2000               | Primary care<br>N=3079 (1537:1542)<br>Mean age 82 years (40%)<br>Mortality rate 2.9%                                                                                        | Assessment at home by nurse case-manager. Follow-up and medical record review. Care plan and active case management for high risk individuals<br>12 months with a mean of 7.7 hours contact<br>Control group received baseline assessment and were eligible for existing case management                                                                                                                               | Follow-up 12 months<br>Death, living at home, living in nursing home or hospice, SF-12 physical status, hospital admission, falls<br>Losses to follow-up 0–12.5%         |
| Reuben and colleagues 1999 <sup>68</sup><br>USA date not stated       | Community-based site<br>N=363 (180:183)<br>Mean age 75.8 years (18%)<br>Mortality rate 1.1%                                                                                 | Assessment at outpatient clinic by social worker, nurse practitioner, geriatrician, and physical therapist. Report to GP. Recommendations to participant and follow-up call<br>96% received assessment<br>Controls received usual care from primary care physician plus non-medical recruitment incentives                                                                                                             | Follow-up 15 months<br>Death, living at home, no reported nursing home admissions, MOS SF-36 physical function, hospital admissions<br>Losses to follow-up 0–1.9%        |
| Rockwood and colleagues 2000 <sup>69*</sup><br>Canada date not stated | General practice<br>N=182 (95:87)<br>Mean age 82.2 years (43%)<br>Mortality rate 11.0%                                                                                      | Home visit for assessment by nurse. Goals and preventive strategy set by nurse and geriatrician. Specific interventions by physiotherapist, occupational therapist, social worker, dietician, audiologist, speech language pathologist, and geriatrician if indicated<br>Up to 3 months with average 3 consults (range 1–6)<br>Control group primary care physician notified of group allocation and patient "frailty" | Follow-up 12 months<br>Death, living at home, institutionalised, Barthel ADL (Granger modification)<br>Losses to follow-up 0–9.3%                                        |
| Rubenstein and colleagues 1989 <sup>70</sup><br>USA date not stated   | Internal medicine practices<br>N=649 (322:327)†<br>34% of participants aged 70+ years (31%)<br>Mortality rate 3.4%                                                          | Physician education programme. Participants completed self-assessment questionnaire at 4-month intervals and returned to physician. Education and goal setting<br>12 months with 4 contacts<br>Control group questionnaires not returned to physician                                                                                                                                                                  | Follow-up 12 months<br>Death, Beth Israel UCLA functional status assessment ADL<br>Losses to follow-up 18.0%                                                             |
| Schrijnemaekers and Haveman 1995 <sup>71</sup><br>Netherlands 1988    | People living at home responding to questionnaire<br>N=222 (110:112)<br>Mean age not stated (36%)<br>Mortality rate 12.6%                                                   | Assessment by geriatrician, psychologist, social worker at outpatient clinic. Advice to individual and GP on treatment and support<br>Two outpatient visits<br>Controls were not invited to the outpatient clinic                                                                                                                                                                                                      | Follow-up 6 months<br>Death, authors' own ADL, falls<br>Losses to follow-up 10.4–11.7%                                                                                   |
| Shapiro and Taylor 2002 <sup>72</sup><br>USA 1998                     | Social services waiting list<br>N=105 (40:65)<br>Mean age 77.7 years (20%)<br>Mortality rate 3.2%                                                                           | Home visit for assessment by nurse. Case manager coordinated delivery of services and conducted follow-up every 3 months. Additional services provided as required<br>Intervention lasted 18 months with six contacts<br>Control group followed up by case manager every 3 months                                                                                                                                      | Follow-up 18 months<br>Death, living at home, institution at follow-up, Ryff environmental mastery<br>Losses to follow-up 27.6–33.3%                                     |

(Continues on next page)

|                                                                    | Study setting<br>Number of participants<br>(intervention: control)<br>Mean age in intervention<br>group (% men)<br>Mortality rate                        | Intervention<br>Intensity<br>Control group activity                                                                                                                                                                                                                                                                                                                                        | Follow up<br>Outcomes<br>Losses to follow-up                                                                                                                                                                 |
|--------------------------------------------------------------------|----------------------------------------------------------------------------------------------------------------------------------------------------------|--------------------------------------------------------------------------------------------------------------------------------------------------------------------------------------------------------------------------------------------------------------------------------------------------------------------------------------------------------------------------------------------|--------------------------------------------------------------------------------------------------------------------------------------------------------------------------------------------------------------|
| (Continued from previous page)                                     |                                                                                                                                                          |                                                                                                                                                                                                                                                                                                                                                                                            |                                                                                                                                                                                                              |
| Silverman and colleagues<br>1995 <sup>3</sup><br>USA 1988          | Medicare or Medicaid patients with referral<br>N=442 (239:203)<br>Mean age 74.6 years (19%)<br>Mortality rate 3.8%                                       | Assessment at outpatient clinic by geriatric internist, geriatric nurse, and geriatric social worker. Treatment plan and family conference. Recommendations to primary care physician. Additional tests and referrals as required<br>1 visit<br>Control group received usual care, physical examination and payment after follow-up                                                        | Follow-up 12 months<br>Death, living at home, nursing home admission, Barthel ADL<br>Losses to follow-up 1.1-10.5%                                                                                           |
| Sommers and colleagues<br>2000 <sup>24</sup><br>USA 1993           | Primary care<br>N=543 (280:263)†<br>Mean age 77 years (31%)<br>Mortality rate 4.8%                                                                       | Self-completed assessment questionnaire. Home visit for assessment by nurse or social worker. Risk reduction plan and targets set. Follow-up visits, small group sessions, and hospital visits. Reassessment and promotion of community services 18 months (mean 14 months) with a mean of 34 nurse or social worker contacts<br>Control group had baseline questionnaire                  | Follow-up 24 months<br>Death, skilled nursing facility admissions in second year of follow-up, Lorig HAQ, hospital admissions<br>Losses to follow-up 2.6-29.3%                                               |
| Stewart and colleagues<br>2005 <sup>25</sup><br>UK 2000            | Referrals to social services or occupational therapy<br>N=321 (160:161)<br>Mean age 81 years (36%)<br>Mortality rate 16.8%                               | Home visit with assessment by occupational therapist. Interventions aimed to minimise individual's dependence on others. Provision of equipment<br>1 month with up to 1 visit<br>Control and intervention group received assessment by social worker                                                                                                                                       | Follow-up 8 months<br>Death, Eakin community dependence index, hospital admissions<br>Losses to follow-up 5.3-6.5%                                                                                           |
| Williams and colleagues<br>1987 <sup>26</sup><br>USA 1983          | Community based including case management agency<br>N=117 (58:59)<br>Mean age 76 years (40%)<br>Mortality rate 8.5%                                      | Assessment and counselling at outpatient clinic by internists, family physicians, psychiatrists, nurses, social workers, dieticians. Goals set, specialist consultations and follow-up visits<br>1 visit with follow-up visits if needed<br>Controls received comprehensive geriatric assessment and care from internist                                                                   | Follow-up 12 months (8 months physical function)<br>Death, maintaining home environment, nursing home admission, patient assessment form functional scale, hospital admissions<br>Losses to follow-up 0-4.3% |
| Zimmer and colleagues<br>1985 <sup>27</sup><br>USA date not stated | Publicity campaign in health professionals and community<br>N=158 (82:76)<br>Mean age 73.8 years (32%)<br>Mortality rate 60.8%                           | Assessment at home by physician, nurse, and social worker. Care plan established and primary care provider designated. Family member or friend to act as care provider and appropriate education and counselling provided<br>6 months with 1 visit and more if appropriate<br>Control received existing services and completed health diaries and were visited by interviewers             | Follow-up 6 months<br>Death, living at home estimated, nursing home admission, SIP physical health, hospital admissions<br>Losses to follow-up 9.5-15.2%                                                     |
| <b>Community-based care after hospital discharge</b>               |                                                                                                                                                          |                                                                                                                                                                                                                                                                                                                                                                                            |                                                                                                                                                                                                              |
| Burns and colleagues<br>1995 <sup>28*</sup><br>USA 1991            | Surgical or neurological hospital discharge<br>N=128 (60:68)<br>Mean age 71.7 years (97%)<br>Mortality rate 11.7%                                        | Assessment at outpatient and long-term management and follow-up by physician, nurse practitioner, social worker, psychologist, and pharmacist<br>24 months with 1 outpatient clinic visit and appropriate follow-up<br>Control group received usual care through ambulatory clinics                                                                                                        | Follow-up 24 months<br>Death, living at home, nursing home at follow-up, Katz ADL, hospital admission<br>Losses to follow-up 0%                                                                              |
| Caplan and colleagues<br>2004 <sup>29*</sup><br>Australia 1996     | Discharged from emergency department<br>N=738 (369:369)<br>Mean age 82.1 years (40%)<br>Mortality rate 9.8%                                              | Assessment by nurse in emergency department and home. Discussion with GP, geriatrician, nurses, physiotherapists, occupational therapists. Initiation of appropriate interventions and referrals<br>4 weeks with a mean of 2.3 visits<br>Control group received discharge plan by medical officer in emergency department                                                                  | Follow-up 18 months<br>Death, living at home, nursing home admissions, Barthel ADL, hospital admissions<br>Losses to follow-up 0-7.5%                                                                        |
| Crotty and colleagues<br>2003 <sup>30*</sup><br>Australia 1998     | Discharged to home after hospital admission for fall-related hip fracture surgery<br>N=66 (34:32)<br>Median age 81.6 years (27%)<br>Mortality rate 10.6% | Home based rehabilitation after early hospital discharge by physiotherapists, occupational therapists, speech pathologists, social workers, and treatment aides. Negotiated set of treatment goals with patients and carers<br>4 months with two or more visits as needed<br>Control group received conventional rehabilitation                                                            | Follow-up 12 months (hospital 4 months)<br>Death, living at home, living in nursing home at follow-up, Shah modified Barthel ADL, SF-36 physical component, falls<br>Losses to follow-up 4.5%                |
| Cunliffe and colleagues<br>2004 <sup>31</sup><br>UK 1999           | Discharge from medical and surgical wards<br>N=370 (185:185)<br>Mean age 80 years (34%)<br>Mortality rate 17.8%                                          | Early hospital discharge and rehabilitation. Assessment in hospital and at home and provision of rehabilitation therapies, assistance or care by occupational therapist, physiotherapist, nurse, community care officer, social service liaison, and rehabilitation assistant<br>1 month with up to 4 home visits per day<br>Control group received usual hospital and post-discharge care | Follow-up 12 months<br>Death, place of residence, nursing home admission, Barthel ADL, hospital admissions<br>Losses to follow-up 0-8.9%                                                                     |
| Dunn and colleagues<br>994 <sup>32</sup><br>UK date not stated     | Discharged home from geriatric ward<br>N=204 (102:102)<br>Mean age 82.7 years (32%)<br>Mortality rate 39.2%                                              | Home visit by health visitor to stabilise patient in own home and deal with any problems identified in pre-discharge based assessment<br>One home visit<br>Control group received pre-discharge assessment and usual follow-up services                                                                                                                                                    | Follow-up 6 months<br>Death, residence at follow-up, nursing home at follow-up, hospital admission<br>Losses to follow-up 0%                                                                                 |

(Continues on next page)

|                                                               | <b>Study setting</b><br><b>Number of participants</b><br><b>(intervention: control)</b><br><b>Mean age in intervention</b><br><b>group (% men)</b><br><b>Mortality rate</b> | <b>Intervention</b><br><b>Intensity</b><br><b>Control group activity</b>                                                                                                                                                                                                                                                                    | <b>Follow up</b><br><b>Outcomes</b><br><b>Losses to follow-up</b>                                                                                                                                        |
|---------------------------------------------------------------|-----------------------------------------------------------------------------------------------------------------------------------------------------------------------------|---------------------------------------------------------------------------------------------------------------------------------------------------------------------------------------------------------------------------------------------------------------------------------------------------------------------------------------------|----------------------------------------------------------------------------------------------------------------------------------------------------------------------------------------------------------|
| (Continued from previous page)                                |                                                                                                                                                                             |                                                                                                                                                                                                                                                                                                                                             |                                                                                                                                                                                                          |
| Ford and colleagues 1971 <sup>83</sup><br>USA date not stated | Discharged from chronic disease rehabilitation hospital<br>N=300 (150:150)<br>Mean age 72 years (33%)<br>Mortality rate 14.2%                                               | Referral by hospital staff to Visiting Nurse Association for home nursing care provided by nurse<br>24 months with 1 or more visits as needed<br>Control not referred to Visiting Nursing Association                                                                                                                                       | Death estimated from graph, living at home estimated, nursing home admissions estimated from graph, Katz ADL, hospital admissions and falls with fracture estimated from graph<br>Losses to follow-up 0% |
| Hansen and colleagues 1992 <sup>84</sup><br>Denmark 1987      | Discharged from medical and surgical specialities<br>N=404 (199:205)‡<br>55% of people aged 80+ years (about 39%)<br>Mortality rate 18.6%                                   | Home visit by district nurse. Identification and solving of new and unforeseen problems and organisation of services. Home visit by GP for socio-medico evaluation<br>2 visits<br>Control received usual care                                                                                                                               | Follow-up 12 months<br>Death, living at home estimated, nursing home admissions, hospital admissions<br>Losses to follow-up 0%                                                                           |
| Hansen and colleagues 1995 <sup>85</sup><br>Denmark 1991      | Discharged from geriatric ward or after rehabilitation<br>N=193 (96:97)<br>Mean age 78.7 years (33%)<br>Mortality rate 37.3%                                                | Post discharge home visits for assessment by geriatrician, nurse, and physical therapist. Home rehabilitation, report to GP and alteration of social services. Appropriate referral to day hospital and sub-acute ward<br>4 months with 4 visits<br>Control group had discharge summary sent to GP and social support arranged at discharge | Follow-up 6 months<br>Death, living at home, nursing home at follow-up, hospital admission<br>Losses to follow-up 0%                                                                                     |
| Hughes and colleagues 2000 <sup>86</sup><br>USA 1994          | Discharged from hospital within 3 months<br>N=1861 (925:936)<br>Mean age 70.4 years (96%)<br>Mortality rate 36.3%                                                           | Screening to identify high-risk patients and targeting of care. Continuity of care and home management by physician, social worker, dietician, therapist, pharmacist, and health technicians<br>Intervention lasted a mean of 5.6 months with a mean of 24 visits<br>Control group had access to care services other than intervention      | Follow-up 12 months<br>Death, Barthel ADL, SF-36 physical function, hospital admissions<br>Losses to follow-up 0-27.8%                                                                                   |
| Leung and colleagues 2004 <sup>87</sup><br>China 2000         | Discharge from rehabilitation hospital<br>N=260 (130:130)<br>Mean age 74.4 years (55%)<br>Mortality rate <9.2%                                                              | Home-based assessment by nurse and social worker. Care plan, referrals and case conferences. Education, counselling and support groups<br>6 months with an estimated mean of 4 visits<br>Controls received conventional health and social services and assessment at 6 monthly intervals                                                    | Follow-up 6 months<br>Living at home calculated, Minimum data set home care ADL, hospital admissions<br>Losses to follow-up 0%                                                                           |
| Martin and colleagues 1994 <sup>88</sup><br>UK 1989           | Discharged from hospital and rehabilitation<br>N=54 (29:25)<br>Mean age 81.5 years (19%)<br>Mortality rate 22.2%                                                            | Clinical assessment before discharge and at home visit by nurse. Care plan, home rehabilitation and appropriate referrals by nurse and health-care assistant<br>Up to 6 weeks with up to 3 visits per day<br>Control group received conventional community services                                                                         | Follow-up 12 months<br>Death, living at home, living in residential care, hospital admissions<br>Losses to follow-up 0%                                                                                  |
| Melin and Bygren 1992 <sup>89</sup><br>Sweden 1988            | Discharge from hospital<br>N=249 (150:99)<br>Mean age 81.3 years (21%)<br>Mortality rate 53.0%                                                                              | Home visits for assessment by nurse and home service assistant, and physician. Treatment plan, 24 hour medical and social services and home visits as required. Weekly monitoring conference with geriatrician and psychiatrist<br>6 months with visits whenever needed<br>Control group discharged to standard care                        | Follow-up 6 months<br>Death, living at home, living in institution estimated, Katz ADL, hospital admissions<br>Losses to follow-up 0-5.1%                                                                |
| Naylor and colleagues 1999 <sup>90*</sup><br>USA 1992         | Discharge after hospital admission<br>N=363 (177:186)<br>Mean age 75.5 years (28%)<br>Mortality rate 12.1%                                                                  | Discharge planning by advanced practice nurse. Assessment at home and management plan for participant, carers, physicians, and other providers. Counselling and monitoring<br>1 month with 2 or more visits<br>Control group received routine discharge planning                                                                            | Follow-up 6 months<br>Death, living at home, living in institution, Moynour enforced social dependency scale, hospital admissions<br>Losses to follow-up 21.8-24.5%                                      |
| Nikolaus and colleagues 1999 <sup>91*</sup><br>Germany 1994   | Discharged from hospital or at risk of nursing home placement<br>N=360 (181:179)<br>Mean age 81.4 years (27%)<br>Mortality rate 17.5%                                       | Assessment before hospital discharge. Post-discharge follow-up by nurse, physiotherapist, occupational therapist, and social worker<br>7.6 days (range 1-41 days) with 3 or more home visits as needed<br>Control group received assessment and usual care in hospital and home                                                             | Follow-up 12 months<br>Death, living at home, living in long-term care institution, Barthel ADL, hospital admissions, falls                                                                              |
| Nikolaus and Bach 2003 <sup>92*</sup><br>Germany 1996         | Discharge to home following inpatient geriatric clinic<br>N=360 (181:179)<br>Mean age 81.2 years (27%)<br>Mortality rate 10.5%                                              | Home visits for assessment by nurse, physiotherapist, and occupational therapist. Case management and information and education provided<br>Mean of 2.6 visits (range 1-8)<br>Control group received assessment with recommendations and falls diary. GP responsible for case management                                                    | Follow-up 12 months<br>Death, living at home, moved to long-term care institution, falls (2 or more)<br>Losses to follow-up 5.0%                                                                         |
| Rubin and colleagues 1993 <sup>93</sup><br>USA 1985           | Patients discharged from hospital emergency room<br>N=194 (97:97)<br>Mean age 76.8 years (39%)<br>Mortality rate 28.9%                                                      | Outpatient assessment by geriatric internist, geriatric psychiatrist, geriatric nurse specialist, and geriatric social worker. Long-term care plan and primary care and clinic management<br>2 months with estimate of many visits<br>Control group medical care team received no recommendations                                           | Follow-up 12 months<br>Death, living at home, nursing home placement, Katz ADL<br>Losses to follow-up 8.2%                                                                                               |

(Continues on next page)

|                                                                           | Study setting<br>Number of participants<br>(intervention: control)<br>Mean age in intervention<br>group (% men)<br>Mortality rate    | Intervention<br>Intensity<br>Control group activity                                                                                                                                                                                                                                                                                                                                                  | Follow up<br>Outcomes<br>Losses to follow-up                                                                                                                                                     |
|---------------------------------------------------------------------------|--------------------------------------------------------------------------------------------------------------------------------------|------------------------------------------------------------------------------------------------------------------------------------------------------------------------------------------------------------------------------------------------------------------------------------------------------------------------------------------------------------------------------------------------------|--------------------------------------------------------------------------------------------------------------------------------------------------------------------------------------------------|
| (Continued from previous page)                                            |                                                                                                                                      |                                                                                                                                                                                                                                                                                                                                                                                                      |                                                                                                                                                                                                  |
| Stewart and colleagues<br>1998 <sup>94</sup><br>Australia date not stated | Patients discharged from medical and surgical units<br>N=762 (381:381)<br>Mean age 66 years (50%)<br>Mortality rate 10.8%            | Assessment and counselling before discharge. High-risk individuals received home visit for assessment and counselling. Referrals and community support. Primary care physician informed of assessment outcome<br>1 or 2 visits<br>Control group received existing discharge planning                                                                                                                 | Follow-up 6 months<br>Death, hospital admissions<br>Losses to follow-up 0%                                                                                                                       |
| Tinetti and colleagues<br>1999 <sup>95</sup><br>USA 1993                  | Hospital discharge after surgical repair of hip fracture<br>N=304 (148:156)<br>Mean age 80.5 years (18%)<br>Mortality rate 6.3%      | Assessment at home by nurse and physical therapist. Appropriate recommendations and referrals. Physical, functional and psychological therapy treatment, home exercise programme and assistive devices<br>6 months with 36–37 visits for physical and functional therapy treatment<br>Control group received 11–15 home visits over 6 months for physical therapy treatment through home-care agency | Follow-up 12 months (6 months hospital and falls)<br>Death, living at home, no nursing home admission reported, Fillenbaum ADL, hospital admissions, falls<br>Losses to follow-up 0–4.3%         |
| Townsend and colleagues<br>1988 <sup>96</sup><br>UK 1984                  | Discharged from hospital<br>N=903 (464:439)<br>Mean age 82 years (36%)<br>Mortality rate 19.0%                                       | Care attendant visits with provision of care, help with rehabilitation, aids for daily living and organisation of social and informal help<br>2 weeks with up to 12 hours care per week<br>Control group received pre-discharge, 2 week and three month assessment, or standard care and assessment after 3 months                                                                                   | Follow-up 12 months (death), 18 months (hospital admission). Interview outcomes 3 months only<br>Death, Sheikh ADL (no assessment after 3 months), hospital admissions<br>Losses to follow-up 0% |
| Trentini and colleagues<br>2001 <sup>97</sup><br>Italy 1992               | Discharged from hospital<br>N=152 (79:73)<br>Mean age 78.7 years (39%)<br>Mortality rate 11.8%                                       | Assessment at outpatient clinic by geriatrician, social worker, nurse (and rehabilitation specialists if required). Treatments, contact with GP, follow-up and diagnostic and therapeutic procedures. Geriatric outpatient clinic<br>12 months with an estimate of 2 visits scheduled<br>Control group received comprehensive geriatric assessment and usual care                                    | Follow-up 12 months<br>Death, living at home, nursing home at follow-up, Katz ADL, hospital admissions<br>Losses to follow-up 0–6.6%                                                             |
| Williams and colleagues<br>1992 <sup>98*</sup><br>UK 1986                 | Discharged from hospital<br>N=470 (231:239)<br>Mean age not specified (not known)<br>Mortality rate 14.9%                            | Assessment by health visitor at home. Advice and counselling<br>12 months with 8 scheduled visits<br>Control group received standard discharge care                                                                                                                                                                                                                                                  | Follow-up 12 months<br>Death, Townsend ADL (not intention to treat analysis)<br>Losses to follow-up 7.7%                                                                                         |
| <b>Fall prevention</b>                                                    |                                                                                                                                      |                                                                                                                                                                                                                                                                                                                                                                                                      |                                                                                                                                                                                                  |
| Clemson and colleagues<br>2004 <sup>99</sup><br>Australia 1999            | Volunteers and primary care<br>N=310 (157:153)<br>Mean age 78.3 years (26%)<br>Mortality rate 1.9%                                   | Community-based cognitive behavioural programme led by occupational therapist. Home visit and 3-month booster session<br>Approximately 5 months with 9 sessions<br>Control group received up to two social visits by student                                                                                                                                                                         | Follow-up 14 months<br>Mobility efficacy scale, SF-36 physical component, falls<br>Losses to follow-up 0–11.8%                                                                                   |
| Close and colleagues<br>1999 <sup>100</sup><br>UK 1995                    | Attended emergency department with primary diagnosis of fall<br>N=397 (184:213)<br>Mean age 77.3 years (32%)<br>Mortality rate 11.6% | Medical and occupational therapy assessment at home and in day hospital by physician and occupational therapist. Advice, education and referrals<br>Less than 1 month with 2 contacts<br>Control group completed falls diary                                                                                                                                                                         | Follow-up 12 months<br>Death, living at home, institutional care, Barthel ADL, total hospital admissions, falls<br>Losses to follow-up 2.8–13.4%                                                 |
| Davison and colleagues<br>2005 <sup>101</sup><br>UK 1998                  | Attending emergency department with fall or fall-related injury<br>N=313 (159:154)<br>Mean age 77 years (28%)<br>Mortality rate 2.6% | Home and hospital based assessment by nurse, physiotherapist, and occupational therapist with appropriate interventions and referrals<br>Median of two outpatient visits and three home visits<br>Control group received baseline interviews but no hospital based assessment                                                                                                                        | Follow-up 12 months<br>Death, hospital admissions (fall related), falls<br>Losses to follow-up 7.3%                                                                                              |
| Gallagher and Brunt<br>1996 <sup>102</sup><br>Canada date not stated      | Volunteers with fall in previous 3 months<br>N=100 (50:50)<br>Mean age 73.8 years (about 80%)<br>Mortality rate 0%                   | Home-based assessment by nurse. Education and counselling<br>2 weeks with 3 visits in addition to baseline assessment<br>Control received assessment and completed falls reports                                                                                                                                                                                                                     | Follow-up 6 months<br>Edwards social ADL, falls<br>Losses to follow-up not reported                                                                                                              |
| Hogan and colleagues<br>2001 <sup>103</sup><br>Canada 1997                | People with history of falling<br>N=163 (79:84)<br>Mean age 77.4 years (28%)<br>Mortality rate 4.3%                                  | Home based assessment and discussion by specialist in geriatric medicine, nurse, occupational therapist, or physiotherapist. Individualised plan, recommendations to participant and GP, advice, home exercise plan. Referral to exercise class<br>6 months with 5 visits<br>Control group received leisure assessment by recreational therapist                                                     | Follow-up 12 months<br>Death, living at home, admitted to an institution, fall related hospital admissions, falls<br>Losses to follow-up 8.6%                                                    |
| Hornbrook and colleagues<br>1994 <sup>104</sup><br>USA date not stated    | Primary care (HMO)<br>N=3,182 (1611:1571)<br>Mean age 73.6 years (38%)<br>Mortality rate not estimable                               | Home visit for assessment by home assessor. Education and action plan. Fall prevention and supervised exercise classes. Assistance with improvements to home safety<br>1 home visit and 9 group meetings<br>Controls received home visit by home assessor. Minimal treatment                                                                                                                         | Follow-up 23 months<br>Falls<br>Losses to follow-up 4.9%                                                                                                                                         |

(Continues on next page)

|                                                                                                                                                                                                                                                                       | <b>Study setting</b><br><b>Number of participants</b><br><b>(intervention: control)</b><br><b>Mean age in intervention</b><br><b>group (% men)</b><br><b>Mortality rate</b> | <b>Intervention</b><br><b>Intensity</b><br><b>Control group activity</b>                                                                                                                                                                                                                                                                                                                             | <b>Follow up</b><br><b>Outcomes</b><br><b>Losses to follow-up</b>                                                                                                                            |
|-----------------------------------------------------------------------------------------------------------------------------------------------------------------------------------------------------------------------------------------------------------------------|-----------------------------------------------------------------------------------------------------------------------------------------------------------------------------|------------------------------------------------------------------------------------------------------------------------------------------------------------------------------------------------------------------------------------------------------------------------------------------------------------------------------------------------------------------------------------------------------|----------------------------------------------------------------------------------------------------------------------------------------------------------------------------------------------|
| (Continued from previous page)                                                                                                                                                                                                                                        |                                                                                                                                                                             |                                                                                                                                                                                                                                                                                                                                                                                                      |                                                                                                                                                                                              |
| Lightbody and colleagues<br>2002 <sup>105</sup><br>UK 1997                                                                                                                                                                                                            | Discharged from A&E after fall<br>N=348 (171:177)<br>Mean age 75 years (26%)<br>Mortality rate 10.3%                                                                        | Home visit for assessment by nurse and management plan. Advice, education, simple home modifications and referrals<br>One visit<br>Control group completed daily falls diaries                                                                                                                                                                                                                       | Follow-up 6 months<br>Death, Barthel ADL, fall related hospital admission, falls<br>Losses to follow-up 0-4.6%                                                                               |
| Lord and colleagues<br>2005 <sup>106</sup><br>Australia date not specified                                                                                                                                                                                            | Health insurance database<br>N=414 (210:204)<br>Mean age 80.3 years (32%)<br>Mortality rate 1.0%                                                                            | Outpatient clinic assessment by researcher, eye specialist, fitness instructor, primary care physician. Recommendations, counselling and referrals. Exercise classes<br>One visit plus appropriate exercise, visual and peripheral sensation interventions<br>Control group had assessment but no intervention                                                                                       | Follow-up 6 months and 12 months (falls)<br>Death, falls<br>Losses to follow-up 1.7-5.1%                                                                                                     |
| Steinberg and colleagues<br>2000 <sup>107*</sup><br>Australia 1996                                                                                                                                                                                                    | National seniors branches<br>N=252 (189:63)†#<br>Mean age 69 years (21%)<br>Mortality rate <2.5%                                                                            | Educational materials and presentations by researcher. Monthly exercise class with fitness trainer. Home visit with financial and practical safety assistance, and clinical assessment with advice. Input from occupational therapist and general practitioner if needed<br>12 months with 12 exercise classes<br>Control group received oral presentation and pamphlet and completed falls calendar | Follow-up 17 months<br>Death or ill health, falls<br>Losses to follow-up <3.6%                                                                                                               |
| Tinetti and colleagues<br>1994 <sup>108</sup><br>USA 1990                                                                                                                                                                                                             | Primary care<br>N=301 (153:148)†#<br>Mean age 78.3 years (31%)<br>Mortality rate 4.0%                                                                                       | Assessment at home by nurse and physical therapist. Home exercise programme, recommendations, training and home modifications. Medication review with primary care physician<br>6 months with a mean of 7.8 home visits<br>Control group completed falls calendar and received visits from social-work students with structured interviews                                                           | Follow-up 12 months<br>Death, hospital admissions, falls<br>Losses to follow-up 0-0.7%                                                                                                       |
| van Haastregt and colleagues<br>2001 <sup>109</sup><br>Netherlands 1997                                                                                                                                                                                               | General practice<br>N=316 (159:157)<br>Mean age 77.2 years (34%)<br>Mortality rate 5.1%                                                                                     | Assessment at home by nurse. Screening for medical, environmental, and behavioural factors. Appropriate advice and referrals<br>12 months with 5 visits per person.<br>Control group received no special attention or intervention                                                                                                                                                                   | Follow-up 18 months<br>Death, Frenchay daily activities, Sickness impact profile mobility control, falls<br>Losses to follow-up 0.9-18.0%                                                    |
| Vetter and colleagues<br>1992 <sup>110</sup><br>UK date not stated                                                                                                                                                                                                    | General practice<br>N=674 (350:324)<br>Mean age 76.8 years (not known)<br>Mortality rate 7.2%                                                                               | Assessment at home by health visitor. Advice, home modifications by local voluntary agencies and authorities and, if appropriate, fitness class<br>48 months with 4 visits or more if needed<br>Control group received baseline assessment                                                                                                                                                           | Follow-up 48 months<br>Death, falls<br>Losses to follow-up 2.8%                                                                                                                              |
| Wagner and colleagues<br>1994 <sup>51</sup><br>Disability and fall prevention intervention (1)<br>USA date not stated                                                                                                                                                 | HMO patients<br>N=1,242 (635:607)<br>Mean age 72.5 years (40%)<br>Mortality rate 1.6%                                                                                       | Assessment at home by nurse. Tailored intervention and motivation by nurse and educator. Referrals, medication review, information, classes if required and encouragement to have home safety inspection. Results to primary care<br>1 month, 1 home visit and 1 exercise orientation class<br>Control group received no specific preventive interventions                                           | Follow-up 24 months<br>Death, living at home, living in institution, MOS SF-36 physical limitations, falls<br>Losses to follow-up 0-1.5%                                                     |
| <b>Group education and counselling</b>                                                                                                                                                                                                                                |                                                                                                                                                                             |                                                                                                                                                                                                                                                                                                                                                                                                      |                                                                                                                                                                                              |
| Beck and colleagues<br>1997 <sup>111*</sup><br>USA date not stated                                                                                                                                                                                                    | Primary care (HMO)<br>N=321 (160:161)<br>Mean age 72 years (34%)<br>Mortality rate 4.4%                                                                                     | Group education on health related topics and disease processes by general practitioner, nurse, clinical psychologist, clinical pharmacist, physical therapist, and dietician. Also individual assessment<br>12 months with mean of 6.6 sessions<br>Control group received usual care                                                                                                                 | Follow-up 12 months<br>Death, living at home, living in skilled nursing facility, Katz ADL, hospital admission<br>Losses to follow-up 0-16.2%                                                |
| Clark and colleagues<br>1997 <sup>112</sup><br>USA 1994                                                                                                                                                                                                               | Retirement complex and private homes<br>N=241 (122:119)<br>Mean age 74.4 years (67%)<br>Mortality rate 2.7%                                                                 | Community complex based individual and group intervention by occupational therapist<br>9 months with individuals attending approximately 36 group sessions<br>Control group received no intervention                                                                                                                                                                                                 | Follow-up 15 months<br>Jette functional status questionnaire ADL, RAND SF-36 physical<br>Losses to follow-up 20.4%                                                                           |
| Scott and colleagues<br>2004 <sup>113*</sup><br>USA 1995                                                                                                                                                                                                              | HMO patients<br>N=294 (145:149)<br>Mean age 74.2 years (41%)<br>Mortality rate 3.4%                                                                                         | Group health education by primary care physician and nurse, with input by physical therapist, pharmacist, occupational therapist, and representatives of community resources as needed. Individual medical examination with appropriate referrals<br>24 months with mean of 10.6 sessions<br>Control group completed health survey and stated interest in attending group clinics                    | Follow-up 24 months<br>Death, Living at home estimated, skilled nursing facility admissions per person, Katz ADL (Wolinsky modification), hospital admissions<br>Losses to follow-up 0-15.3% |
| HMO=health maintenance organisation. QWB=Quality of Well Being. ADL=activities of daily living. UCLA=University of California, Los Angeles.*Additional information provided by authors. †Cluster randomisation. ‡Alternate allocation or allocation by date of birth. |                                                                                                                                                                             |                                                                                                                                                                                                                                                                                                                                                                                                      |                                                                                                                                                                                              |
| <b>Webtable 1: Characteristics of randomised controlled trials included in the systematic review</b>                                                                                                                                                                  |                                                                                                                                                                             |                                                                                                                                                                                                                                                                                                                                                                                                      |                                                                                                                                                                                              |
