# Supplementary material
Source: PubMed Central journal article supplement (PMC2262920)
Supplement: mmc8.pdf [file mmc8.pdf]

## Complex interventions to improve physical function and maintain independent living in elderly people: a systematic review and meta-analysis

|                         | Not living at home                                     | Death                                                  | Nursing home admission                                 | Hospital admission                                     | People with falls                                      | Physical function                                         |
|-------------------------|--------------------------------------------------------|--------------------------------------------------------|--------------------------------------------------------|--------------------------------------------------------|--------------------------------------------------------|-----------------------------------------------------------|
| Number                  | 79 578                                                 | 93 754                                                 | 79 575                                                 | 20 047                                                 | 15 607                                                 | 21 651                                                    |
| Losses to follow-up (%) |                                                        |                                                        |                                                        |                                                        |                                                        |                                                           |
| ≤1%                     | 0.95 (0.93 to 0.97)<br>( <i>I</i> <sup>2</sup> =21.9%) | 1.01 (0.98 to 1.04)<br>( <i>I</i> <sup>2</sup> =23.0%) | 0.86 (0.82 to 0.89)<br>( <i>I</i> <sup>2</sup> =25.9%) | 0.93 (0.90 to 0.97)<br>( <i>I</i> <sup>2</sup> =32.5%) | ..                                                     | ..                                                        |
| ≤5%                     | ..                                                     | ..                                                     | ..                                                     | ..                                                     | 0.91 (0.86 to 0.97)<br>( <i>I</i> <sup>2</sup> =49.0%) | -0.08 (-0.14 to -0.02)<br>( <i>I</i> <sup>2</sup> =42.2%) |
| All                     | 0.95 (0.93 to 0.97)<br>( <i>I</i> <sup>2</sup> =29.3%) | 1.00 (0.97 to 1.02)<br>( <i>I</i> <sup>2</sup> =10.6%) | 0.87 (0.83 to 0.90)<br>( <i>I</i> <sup>2</sup> =29.0%) | 0.94 (0.91 to 0.97)<br>( <i>I</i> <sup>2</sup> =43.0%) | 0.90 (0.86 to 0.95)<br>( <i>I</i> <sup>2</sup> =52.8%) | -0.08 (-0.11 to -0.06)<br>( <i>I</i> <sup>2</sup> =45.9%) |

**Webtable 2: Relative risk (95% CIs) of outcome by quality of studies (standardised mean difference for physical function) and *I*<sup>2</sup> heterogeneity statistic**

Correspondence to:  
 Andrew D Beswick, Department  
 of Social Medicine, University of  
 Bristol, Canynge Hall,  
 Whiteladies Road, Bristol  
 BS8 2PR, UK  
[andy.beswick@bristol.ac.uk](mailto:andy.beswick@bristol.ac.uk)
