# Supplementary material
Source: PubMed Central journal article supplement (PMC2262920)
Supplement: mmc9.pdf [file mmc9.pdf]

## Complex interventions to improve physical function and maintain independent living in elderly people: a systematic review and meta-analysis

|                                  | Not living at home                                     | Death                                                  | Nursing home admission                                 | Hospital admission                                     | People with falls                                      | Physical function                                         |
|----------------------------------|--------------------------------------------------------|--------------------------------------------------------|--------------------------------------------------------|--------------------------------------------------------|--------------------------------------------------------|-----------------------------------------------------------|
| Number                           | 79 578                                                 | 93 754                                                 | 79 575                                                 | 20 047                                                 | 12 425                                                 | 21 651                                                    |
| Death rate (percentage per year) |                                                        |                                                        |                                                        |                                                        |                                                        |                                                           |
| <4.2%                            | 1.06 (0.93 to 1.21)<br>( <i>I</i> <sup>2</sup> =58.3%) | 1.02 (0.88 to 1.17)<br>( <i>I</i> <sup>2</sup> =0%)    | 1.25 (0.99 to 1.59)<br>( <i>I</i> <sup>2</sup> =60.8%) | 0.92 (0.85 to 1.00)<br>( <i>I</i> <sup>2</sup> =0%)    | 0.86 (0.80 to 0.91)<br>( <i>I</i> <sup>2</sup> =36.8%) | -0.05 (-0.09 to -0.01)<br>( <i>I</i> <sup>2</sup> =60.3%) |
| 4.2%–6.6%                        | 0.91 (0.84 to 0.98)<br>( <i>I</i> <sup>2</sup> =3.5%)  | 0.93 (0.86 to 1.01)<br>( <i>I</i> <sup>2</sup> =0%)    | 0.88 (0.74 to 1.06)<br>( <i>I</i> <sup>2</sup> =4.5%)  | 0.86 (0.79 to 0.94)<br>( <i>I</i> <sup>2</sup> =0%)    | 0.99 (0.86 to 1.14)<br>( <i>I</i> <sup>2</sup> =0%)    | -0.13 (-0.18 to -0.08)<br>( <i>I</i> <sup>2</sup> =37.8%) |
| 6.7%–11.0%                       | 0.96 (0.93 to 0.98)<br>( <i>I</i> <sup>2</sup> =14.1%) | 1.00 (0.97 to 1.03)<br>( <i>I</i> <sup>2</sup> =44.1%) | 0.86 (0.82 to 0.90)<br>( <i>I</i> <sup>2</sup> =18.8%) | 0.98 (0.92 to 1.04)<br>( <i>I</i> <sup>2</sup> =72.0%) | 0.92 (0.80 to 1.05)<br>( <i>I</i> <sup>2</sup> =78.4%) | -0.08 (-0.16 to 0.00)<br>( <i>I</i> <sup>2</sup> =0%)     |
| ≥11.1%                           | 0.88 (0.79 to 0.96)<br>( <i>I</i> <sup>2</sup> =2.9%)  | 1.00 (0.92 to 1.09)<br>( <i>I</i> <sup>2</sup> =0%)    | 0.75 (0.63 to 0.89)<br>( <i>I</i> <sup>2</sup> =0%)    | 0.96 (0.92 to 1.01)<br>( <i>I</i> <sup>2</sup> =54.5%) | 0.81 (0.50 to 1.33)<br>( <i>I</i> <sup>2</sup> =51.2%) | -0.12 (-0.22 to -0.02)<br>( <i>I</i> <sup>2</sup> =58.1%) |
| All                              | 0.95 (0.93 to 0.97)<br>( <i>I</i> <sup>2</sup> =29.3%) | 1.00 (0.97 to 1.02)<br>( <i>I</i> <sup>2</sup> =10.6%) | 0.87 (0.83 to 0.90)<br>( <i>I</i> <sup>2</sup> =29.0%) | 0.94 (0.91 to 0.97)<br>( <i>I</i> <sup>2</sup> =43.0%) | 0.88 (0.84 to 0.93)<br>( <i>I</i> <sup>2</sup> =51.1%) | -0.08 (-0.11 to -0.06)<br>( <i>I</i> <sup>2</sup> =45.9%) |

Data were not available from some studies for death rates and mean age.

**Webtable 3: Relative risk (95% CIs) of outcome by death rate (standardised mean difference for physical function) and *I*<sup>2</sup> heterogeneity statistic**

Correspondence to:  
 Andrew D Beswick, Department  
 of Social Medicine, University of  
 Bristol, Canynge Hall,  
 Whiteladies Road, Bristol  
 BS8 2PR, UK  
[andy.beswick@bristol.ac.uk](mailto:andy.beswick@bristol.ac.uk)
