# Supplementary material
Source: PubMed Central journal article supplement (PMC2262920)
Supplement: mmc10.pdf [file mmc10.pdf]

## Complex interventions to improve physical function and maintain independent living in elderly people: a systematic review and meta-analysis

|                  | Not living at home                                     | Death                                                  | Nursing home admission                                 | Hospital admission                                     | People with falls                                      | Physical function                                         |
|------------------|--------------------------------------------------------|--------------------------------------------------------|--------------------------------------------------------|--------------------------------------------------------|--------------------------------------------------------|-----------------------------------------------------------|
| Number           | 79 578                                                 | 93 754                                                 | 79 575                                                 | 20 047                                                 | 15 607                                                 | 21 651                                                    |
| Date             |                                                        |                                                        |                                                        |                                                        |                                                        |                                                           |
| 1992 and earlier | 0.89 (0.84 to 0.93)<br>( <i>I</i> <sup>2</sup> =7.7%)  | 0.93 (0.88 to 0.98)<br>( <i>I</i> <sup>2</sup> =19.4%) | 0.80 (0.72 to 0.89)<br>( <i>I</i> <sup>2</sup> =15.2%) | 0.97 (0.92 to 1.02)<br>( <i>I</i> <sup>2</sup> =55.9%) | 0.91 (0.85 to 0.97)<br>( <i>I</i> <sup>2</sup> =70.0%) | -0.12 (-0.16 to -0.07)<br>( <i>I</i> <sup>2</sup> =20.8%) |
| 1993 and later   | 0.97 (0.94 to 0.99)<br>( <i>I</i> <sup>2</sup> =34.4%) | 1.02 (0.99 to 1.05)<br>( <i>I</i> <sup>2</sup> =0%)    | 0.88 (0.84 to 0.92)<br>( <i>I</i> <sup>2</sup> =39.5%) | 0.92 (0.88 to 0.96)<br>( <i>I</i> <sup>2</sup> =16.0%) | 0.90 (0.85 to 0.96)<br>( <i>I</i> <sup>2</sup> =41.8%) | -0.06 (-0.10 to -0.03)<br>( <i>I</i> <sup>2</sup> =50.6%) |
| All              | 0.95 (0.93 to 0.97)<br>( <i>I</i> <sup>2</sup> =29.3%) | 1.00 (0.97 to 1.02)<br>( <i>I</i> <sup>2</sup> =10.6%) | 0.87 (0.83 to 0.90)<br>( <i>I</i> <sup>2</sup> =29.0%) | 0.94 (0.91 to 0.97)<br>( <i>I</i> <sup>2</sup> =43.0%) | 0.90 (0.86 to 0.95)<br>( <i>I</i> <sup>2</sup> =52.8%) | -0.08 (-0.11 to -0.06)<br>( <i>I</i> <sup>2</sup> =45.9%) |

**Webtable 4:** Relative risk (95% CIs) of outcome by date recruitment started (standardised mean difference for physical function) and *I*<sup>2</sup> heterogeneity statistic

Correspondence to:  
 Andrew D Beswick, Department  
 of Social Medicine, University of  
 Bristol, Canynge Hall,  
 Whiteladies Road, Bristol  
 BS8 2PR, UK  
[andy.beswick@bristol.ac.uk](mailto:andy.beswick@bristol.ac.uk)
