# Supplementary material
Source: PubMed Central journal article supplement (PMC2262920)
Supplement: mmc11.pdf [file mmc11.pdf]

## Complex interventions to improve physical function and maintain independent living in elderly people: a systematic review and meta-analysis

|                       | Not living at home                             | Death                                          | Nursing home admission                         | Hospital admission                             | People with falls                              | Physical function                                 |
|-----------------------|------------------------------------------------|------------------------------------------------|------------------------------------------------|------------------------------------------------|------------------------------------------------|---------------------------------------------------|
| Number                | 74 845                                         | 84 597                                         | 74 842                                         | 19 188                                         | 14 811                                         | 16 077                                            |
| Age quartiles (years) |                                                |                                                |                                                |                                                |                                                |                                                   |
| ≤74                   | 0.86 (0.79 to 0.94)<br>(I <sup>2</sup> =13.3%) | 0.93 (0.86 to 1.00)<br>(I <sup>2</sup> =47.4%) | 0.79 (0.62 to 1.01)<br>(I <sup>2</sup> =0%)    | 0.97 (0.91 to 1.03)<br>(I <sup>2</sup> =44.9%) | 0.89 (0.83 to 0.96)<br>(I <sup>2</sup> =59.8%) | -0.16 (-0.22 to -0.10)<br>(I <sup>2</sup> =19.7%) |
| 74.1-77.3             | 0.94 (0.82 to 1.08)<br>(I <sup>2</sup> =48.6%) | 0.89 (0.79 to 1.01)<br>(I <sup>2</sup> =7.1%)  | 1.25 (0.93 to 1.68)<br>(I <sup>2</sup> =0%)    | 0.88 (0.81 to 0.95)<br>(I <sup>2</sup> =37.9%) | 0.90 (0.81 to 1.00)<br>(I <sup>2</sup> =81.7%) | -0.10 (-0.17 to -0.04)<br>(I <sup>2</sup> =54.5%) |
| 77.4-80.5             | 0.92 (0.86 to 0.99)<br>(I <sup>2</sup> =14.1%) | 0.96 (0.89 to 1.04)<br>(I <sup>2</sup> =0%)    | 0.84 (0.74 to 0.95)<br>(I <sup>2</sup> =16.3%) | 0.98 (0.92 to 1.04)<br>(I <sup>2</sup> =60.1%) | 0.88 (0.79 to 0.98)<br>(I <sup>2</sup> =0%)    | -0.11 (-0.20 to -0.02)<br>(I <sup>2</sup> =66.7%) |
| ≥80.7                 | 0.96 (0.94 to 0.98)<br>(I <sup>2</sup> =20.1%) | 1.02 (0.99 to 1.06)<br>(I <sup>2</sup> =0%)    | 0.87 (0.83 to 0.91)<br>(I <sup>2</sup> =55.7%) | 0.92 (0.85 to 0.98)<br>(I <sup>2</sup> =20.1%) | 0.95 (0.85 to 1.06)<br>(I <sup>2</sup> =23.3%) | -0.02 (-0.08 to 0.03)<br>(I <sup>2</sup> =0%)     |
| All                   | 0.95 (0.93 to 0.97)<br>(I <sup>2</sup> =26.6%) | 1.00 (0.97 to 1.02)<br>(I <sup>2</sup> =14.8%) | 0.87 (0.83 to 0.91)<br>(I <sup>2</sup> =28.9%) | 0.94 (0.91 to 0.97)<br>(I <sup>2</sup> =45.2%) | 0.90 (0.86 to 0.95)<br>(I <sup>2</sup> =56.3%) | -0.09 (-0.12 to -0.06)<br>(I <sup>2</sup> =47.2%) |

Data were not available from some studies for death rates and mean age.

**Webtable 5: Relative risk (95% CIs) of outcome by mean age at recruitment (standardised mean difference for physical function) and I<sup>2</sup> heterogeneity statistic**

Correspondence to:  
 Andrew D Beswick, Department  
 of Social Medicine, University of  
 Bristol, Canynge Hall,  
 Whiteladies Road, Bristol  
 BS8 2PR, UK  
[andy.beswick@bristol.ac.uk](mailto:andy.beswick@bristol.ac.uk)
