# Supplementary material
Source: PubMed Central journal article supplement (PMC2262920)
Supplement: mmc12.pdf [file mmc12.pdf]

## Complex interventions to improve physical function and maintain independent living in elderly people: a systematic review and meta-analysis

|                           | Not living at home                                     | Death                                                  | Nursing home admission                                 | Hospital admission                                     | People with falls                                      | Physical function                                         |
|---------------------------|--------------------------------------------------------|--------------------------------------------------------|--------------------------------------------------------|--------------------------------------------------------|--------------------------------------------------------|-----------------------------------------------------------|
| Number                    | 79 578                                                 | 93 754                                                 | 79 575                                                 | 20 047                                                 | 15 607                                                 | 21 651                                                    |
| Intensity of intervention |                                                        |                                                        |                                                        |                                                        |                                                        |                                                           |
| Low                       | 0.96 (0.93 to 0.98)<br>( <i>I</i> <sup>2</sup> =18.9%) | 1.01 (0.98 to 1.04)<br>( <i>I</i> <sup>2</sup> =27.5%) | 0.86 (0.83 to 0.91)<br>( <i>I</i> <sup>2</sup> =0.3%)  | 0.93 (0.87 to 0.99)<br>( <i>I</i> <sup>2</sup> =44.0%) | 0.76 (0.68 to 0.84)<br>( <i>I</i> <sup>2</sup> =14.0%) | -0.09 (-0.15 to -0.04)<br>( <i>I</i> <sup>2</sup> =52.5%) |
| Medium                    | 0.93 (0.89 to 0.98)<br>( <i>I</i> <sup>2</sup> =38.0%) | 0.94 (0.89 to 1.00)<br>( <i>I</i> <sup>2</sup> =9.9%)  | 0.86 (0.77 to 0.96)<br>( <i>I</i> <sup>2</sup> =29.5%) | 0.97 (0.91 to 1.04)<br>( <i>I</i> <sup>2</sup> =63.6%) | 0.97 (0.91 to 1.03)<br>( <i>I</i> <sup>2</sup> =48.5%) | -0.06 (-0.10 to -0.02)<br>( <i>I</i> <sup>2</sup> =58.0%) |
| High                      | 0.93 (0.84 to 1.02)<br>( <i>I</i> <sup>2</sup> =22.0%) | 1.02 (0.94 to 1.10)<br>( <i>I</i> <sup>2</sup> =0%)    | 0.92 (0.77 to 1.10)<br>( <i>I</i> <sup>2</sup> =48.3%) | 0.93 (0.89 to 0.98)<br>( <i>I</i> <sup>2</sup> =0%)    | 0.89 (0.81 to 0.98)<br>( <i>I</i> <sup>2</sup> =25.9%) | -0.12 (-0.17 to -0.06)<br>( <i>I</i> <sup>2</sup> =4.3%)  |
| All                       | 0.95 (0.93 to 0.97)<br>( <i>I</i> <sup>2</sup> =29.3%) | 1.00 (0.97 to 1.02)<br>( <i>I</i> <sup>2</sup> =10.6%) | 0.87 (0.83 to 0.90)<br>( <i>I</i> <sup>2</sup> =29.0%) | 0.94 (0.91 to 0.97)<br>( <i>I</i> <sup>2</sup> =43.0%) | 0.90 (0.86 to 0.95)<br>( <i>I</i> <sup>2</sup> =52.8%) | -0.08 (-0.11 to -0.06)<br>( <i>I</i> <sup>2</sup> =45.9%) |

**Webtable 6:** Relative risk of outcome (95% CIs) by intensity of intervention (standardised mean difference for physical function) and *I*<sup>2</sup> heterogeneity statistic

Correspondence to:  
 Andrew D Beswick, Department  
 of Social Medicine, University of  
 Bristol, Canynge Hall,  
 Whiteladies Road, Bristol  
 BS8 2PR, UK  
[andy.beswick@bristol.ac.uk](mailto:andy.beswick@bristol.ac.uk)
