# Supplementary material
Source: PubMed Central journal article supplement (PMC2262920)
Supplement: mmc13.pdf [file mmc13.pdf]

## Complex interventions to improve physical function and maintain independent living in elderly people: a systematic review and meta-analysis

|                           | Not living at home                      | Death                                   | Nursing home admission                  | Hospital admission                       | People with falls                       | Physical function                          |
|---------------------------|-----------------------------------------|-----------------------------------------|-----------------------------------------|------------------------------------------|-----------------------------------------|--------------------------------------------|
| Number                    | 79 578                                  | 93 754                                  | 79 575                                  | 20 047                                   | 15 607                                  | 21 651                                     |
| No activity in controls   | 0.96 (0.90 to 1.01)<br>( $I^2=25.5\%$ ) | 0.98 (0.93 to 1.03)<br>( $I^2=18.4\%$ ) | 0.89 (0.80 to 0.99)<br>( $I^2=33.5\%$ ) | 0.96 (0.92 to 0.99)<br>( $I^2=58.3\%$ )  | 0.86 (0.79 to 0.94)<br>( $I^2=65.9\%$ ) | -0.08 (-0.11 to -0.04)<br>( $I^2=13.9\%$ ) |
| Some activity in controls | 0.95 (0.93 to 0.97)<br>( $I^2=35.3\%$ ) | 1.00 (0.97 to 1.03)<br>( $I^2=0\%$ )    | 0.86 (0.82 to 0.90)<br>( $I^2=24.8\%$ ) | 0.91 (0.86 to 0.97)<br>( $I^2=12.6\%$ )  | 0.92 (0.88 to 0.97)<br>( $I^2=38.7\%$ ) | -0.09 (-0.13 to -0.05)<br>( $I^2=64.4\%$ ) |
| All                       | 0.95 (0.93 to 0.97)<br>( $I^2=29.3\%$ ) | 1.00 (0.97 to 1.02)<br>( $I^2=10.6\%$ ) | 0.87 (0.83 to 0.90)<br>( $I^2=29.0\%$ ) | 0.94 (0.91 to -0.97)<br>( $I^2=43.0\%$ ) | 0.90 (0.86 to 0.95)<br>( $I^2=52.8\%$ ) | -0.08 (-0.11 to -0.06)<br>( $I^2=45.9\%$ ) |

**Webtable 7:** Relative risk of outcome (95% CIs) by activity in control group (standardised mean difference for physical function) and  $I^2$  heterogeneity statistic

Correspondence to:  
 Andrew D Beswick, Department  
 of Social Medicine, University of  
 Bristol, Canynge Hall,  
 Whiteladies Road, Bristol  
 BS8 2PR, UK  
[andy.beswick@bristol.ac.uk](mailto:andy.beswick@bristol.ac.uk)
